26 **Abstract**

27 Clinical studies have suggested that cerebellar dysfunction is involved in various psychiatric  
28 disorders, including autism spectrum disorders, dyslexia, and depressive disorders. However, the  
29 physiological aspect is less-advanced. Here, we comprehensively investigated the immune-triggered  
30 excitability plasticity in the cerebellum. Activated microglia (MG) via exposure to bacterial  
31 endotoxin lipopolysaccharide or heat-killed Gram-negative bacteria induced a potentiation of the  
32 excitability of Purkinje neurons, which was suppressed by MG-activity inhibitor and MG-depletion.  
33 An inflammatory cytokine, tumor necrosis factor- $\alpha$  (TNF- $\alpha$ ) released from MG triggered this  
34 plasticity. While our new two-photon FRET ATP-imaging showed an increase in ATP concentration  
35 following endotoxin exposure, both TNF- $\alpha$  and ATP secretion facilitated synaptic transmission.  
36 Inflammation in the cerebellar anterior vermis *in vivo* immobilized animals, and reduced sociability.  
37 Such abulia-like behavioral impairments were reverted by TNF- $\alpha$ -inhibition and MG-depletion.  
38 Resting-state functional MRI revealed overconnectivity between the inflamed cerebellum and  
39 prefrontal neocortical regions, which may underlie the psychomotor depressiveness in animals.

40

41

42 **Main text**

43 Excessive activation of microglia (MG)—the resident immune cells of the central nervous system  
44 (CNS)—causes neuroinflammatory responses following immune challenges in the brain. While  
45 accumulating evidence prevailed a notion that MG are associated with not only inflammation  
46 consisting of “tumor, rubor, calor et dolor” due to microbial pathogens, but also emotional or mood-  
47 related psychiatric diseases accompanied by psychological stress or morbidity, the full physiological  
48 effects of immune-related responses on the CNS remain unclear<sup>1-9</sup>.

49         Recent reports showed that transient exposure of hippocampal slices to the Gram-negative  
50 bacterial endotoxin, lipopolysaccharide (LPS), enhances presynaptic excitatory transmitter release<sup>10</sup>  
51 and depresses the postsynaptic efficacy of glutamate receptors under conditions of low oxygenation<sup>11</sup>,  
52 through MG activation. While activated MG release ATP and reactive oxygen species resulting in  
53 the induction of these synaptic plasticity<sup>10,11</sup>, inflammatory cytokines are also known to modulate  
54 synaptic transmission<sup>12-15</sup>. In contrast, CNS neurons exhibit a form of plasticity that enables them to  
55 modify intrinsic firing properties in response to the external activity. Several reports showed that  
56 activated MG may alter non-synaptic membrane excitability in neurons in the retina, hippocampus,  
57 or neocortex; however, direct evidence regarding the long-term plasticity of intrinsic excitability via  
58 MG, the mechanisms at cellular level, and the relevance to animal diseases are yet lacking.

59         In the present study, we investigated whether MG, activated by exposure to bacterial  
60 endotoxin or heat-killed bacteria, modulate cerebellar neuronal excitability, and we aimed to  
61 elucidate the induction mechanism of excitability plasticity. Further, we examined the effect of  
62 aberrant neuronal excitability on animal behavior and functional connectivity during cerebellar  
63 inflammation, and we challenged whether the symptoms of acute cerebellitis could be rescued.

64

65

66

## 67 **Results**

### 68 **Microglia modulate the intrinsic excitability of cerebellar Purkinje neurons**

69 To investigate the nature of immune-neuronal interactions, we examined the neuronal  
70 excitability of Purkinje cells—the principle output neurons of the cerebellar cortex—following  
71 exposure to the endotoxin LPS (10–12 µg/mL), an outer membrane component of Gram-negative  
72 bacteria. LPS was applied to cerebellar slices in a bath-chamber, after which the firing properties of  
73 Purkinje neurons were examined under current-clamp (**Fig. 1a,b**). The firing frequency of neurons in  
74 response to depolarization with different current pulses was significantly higher after LPS-  
75 application than that under control conditions. To investigate the time course of firing changes, we  
76 subjected slices to transient LPS exposure, then continuously monitored subsequent firing properties.  
77 Firing frequency was significantly higher relative to baseline following LPS exposure than control  
78 (\* $p < 0.001$ ) (**Fig. 1c,d**). We next applied heat-killed Gram-negative bacteria (**Fig. 1e**). Neurons  
79 treated with heat-killed *Escherichia coli* (*E. coli*) 0111:B4 (HKEB) or *Pseudomonas aeruginosa*  
80 (HKPA) ( $10^7$  cells/mL) exhibited significantly higher firing frequencies than control neurons.  
81 However, neurons exposed to Gram-positive bacteria (heat-killed *Streptococcus pneumoniae*, HKSP)  
82 that have no LPS did not exhibit any significant increases in firing. Results obtained from long-term  
83 recordings also indicated the firing increase following exposure to heat-killed Gram-negative  
84 bacteria (**Fig. 1f,g**) (HKEB and HKPA, \* $p < 0.03$ ) but not Gram-positive bacteria (HKSP,  $p > 0.1$ ).  
85 Action potential waveforms also suggested that Purkinje neurons showed enhanced excitability  
86 following endotoxin exposure (**Supplementary Table 1**). Another major cell-wall component  
87 derived from *E. coli*, peptidoglycan (PGN), did not significantly alter the waveforms  
88 (**Supplementary Table 1**). Experiments with NBQX suggested that this firing plasticity was induced  
89 without the involvement of AMPA receptors (\* $p < 0.05$ ) (**Supplementary Fig. 1a,b**). Thus, our  
90 findings suggest that endotoxin exposure substantially altered the intrinsic membrane excitability of  
91 neurons.

92 Previously, Belmeguenai *et al.*<sup>16</sup> demonstrated that Purkinje cells exhibit intrinsic plasticity  
93 (IP), which is defined as an increase in firing frequency, with shortening spike pauses, lasting for  
94 more than 30 min<sup>16-19</sup>. Simultaneous somato-dendritic recordings demonstrated the enhancement of  
95 dendritic excitability accompanied with IP<sup>17</sup>. These increases in firing frequency and dendritic  
96 excitability are induced by transient depolarization of the neuronal membrane or parallel fiber  
97 stimulation via phosphatase-dependent signaling and down-regulation of small conductance Ca<sup>2+</sup>-  
98 activated K<sup>+</sup> channels (SK channels). Findings from conditional knockout mice for protein  
99 phosphatase 2B (PP2B) suggest that the IP is associated with cerebellar motor coordination<sup>20</sup>.  
100 Considering results obtained from occlusion experiments of the IP by pre-exposed LPS  
101 (**Supplementary Fig. 1c**) and impairment of IP induction under SK channel blockade by apamin  
102 (**Supplementary Fig. 1d**), the firing increase following endotoxin exposure was induced through the  
103 same molecular signaling for IP<sup>16-19</sup>, depending on intra-neuronal Ca<sup>2+</sup> and protein phosphatases  
104 PP1, PP2A, and PP2B (**Supplementary Fig. 1e-g**).

105 We next investigated changes in action potentials after LPS-application on both soma and  
106 dendrites (**Fig. 1h,i**). We applied somatic depolarization pulses under control condition, in the  
107 presence of an SK-channel blocker, and after LPS-exposure. Passively back-propagated action  
108 potentials toward dendrites significantly increased in amplitude following LPS-administration (\*p <  
109 0.04), relative to those under SK channel blockade (\*p < 0.002), in a distance-dependent manner  
110 along soma-dendrite axis<sup>17</sup> (**Fig. 1i**), suggesting that MG activation by endotoxin enhances  
111 excitability at dendrites via down-regulation of SK2 channels.

112 Given that the increase in firing frequency was triggered by MG, elimination of MG may  
113 block this plasticity. To deplete MG in living animals, we administered the colony-stimulating factor  
114 1 receptor (CSF-1R) kinase inhibitor Ki20227<sup>21,22</sup>. Following continuous oral administration of  
115 Ki20227 or with drink in three different concentration, the number of MG in the immunostained  
116 cerebellar cortex was reduced to 14% at maximum (\*p < 0.00001, *multiple comparison*) (**Fig. 1j,k**

117 and **Supplementary Fig. 2**). Therefore, our Ki20227-administration depleted almost all the MG in  
118 the cerebellum. When the neuronal excitability was examined in the MG-depleted cerebella, no  
119 increases in firing was observed against exposure to LPS and heat-killed Gram-negative bacteria  
120 (HKGn: HKEB+HKPA) (**Fig. 1l**). Long-term recordings also showed that, while innate firing  
121 frequency increased after 5-Hz conditioning for IP (\* $p < 0.05$ ), exposure to LPS and HKGn no  
122 longer increased the frequency (LPS, \* $p < 0.05$  of reduction; HKGn,  $p > 0.3$ ) (**Fig. 1m,n**). These  
123 results indicate that MG are involved in increasing the excitability of cerebellar neurons, which is  
124 supported by results of minocycline co-application ( $p > 0.7$ ) (**Supplementary Fig. 3**).

125

## 126 **Involvement of inflammatory cytokine in the excitability plasticity**

127 A possible mechanism for MG-triggered neural hyperexcitability is mediated by  
128 inflammatory cytokines, including TNF- $\alpha$ , interleukin (IL)-6, and IL-1 $\beta$ . Among them, TNF- $\alpha$  is  
129 released in the earliest phase of immune-cell stimulation. We first examined the firing frequency of  
130 neurons treated with TNF- $\alpha$ . Firing frequency of TNF- $\alpha$ -treated neurons was significantly higher  
131 than in control or PGN-treated (**Fig. 2a,b**). In addition, co-application of LPS or HKGn bacteria with  
132 the TNF- $\alpha$  inhibitor C87 abolished the increase in firing frequency (both  $p > 0.5$ ) (**Fig. 2c**). To  
133 confirm the effect of TNF- $\alpha$ , neurons were subjected to bath-application of TNF- $\alpha$ , and the TNF- $\alpha$   
134 treatment increased firing frequency similar to that observed following LPS administration (\* $p <$   
135 0.03) (**Fig. 2d**). Application of LPS to Purkinje neurons pre-exposed to TNF- $\alpha$  prevented the  
136 excitability increase ( $p > 0.5$ ), implying that TNF- $\alpha$  release and excitability plasticity were both  
137 resulted from LPS application. Although our results suggest that TNF- $\alpha$  directs Purkinje neurons to  
138 enhance excitability, the mechanisms underlying this process remain unclear. A series of studies in  
139 hippocampal neurons previously demonstrated that TNF- $\alpha$  activates phosphatase signaling via TNF  
140 receptor 1 in CA1 pyramidal neurons<sup>12,13</sup>. Then, we subjected Purkinje neurons to bath-application of  
141 TNF- $\alpha$  under suppression of phosphatase activity by intra-neuronal okadaic acid, but no increases

142 were observed in firing frequency ( $p > 0.3$ ) (**Fig. 2e**), suggesting the TNF- $\alpha$ -mediated firing  
143 plasticity occurred through phosphatase activity.

144 Western blotting confirmed the increase in the amount of TNF- $\alpha$ , but not IL-6 or IL-1 $\beta$  (**Fig.**  
145 **2f,g**) by a transient exposure to LPS, indicating that TNF- $\alpha$  release mediates signaling between MG  
146 and Purkinje neurons. We also monitored action potential firing in the presence of protein-synthesis  
147 inhibitors anisomycin and cycloheximide, which did not prevent LPS-induced firing increases ( $*p <$   
148  $0.03$  for both) (**Supplementary Fig. 4**). These findings suggest that endotoxin exposure may  
149 stimulate TNF- $\alpha$  release from MG in a protein-synthesis-independent manner, and that diffusible  
150 TNF- $\alpha$  triggered the increase in neuronal excitability.

151 It is also possible that bacterial endotoxin triggers excitability plasticity via ATP release from  
152 tissues including MG<sup>2,3,10,23</sup>. Hence, we confirmed ATP synthesis and release in the whole  
153 cerebellum in knock-in mice with the ATeam probe GO-ATeam2 (see Methods), which we  
154 developed newly. Two-photon fluorescence/Förster resonance energy transfer (FRET) imaging  
155 suggested that continuous exposure to both LPS and HKGn increase ATP concentration prominently  
156 in the cerebellar molecular layer (**Fig. 2h,i** and **Supplementary Fig. 5a**). We estimated the ATP  
157 concentration changes from FRET ratio changes against endotoxin exposure (see Methods), and the  
158 extent of ATP increase reached 140  $\mu\text{M}$  in the molecular layer (**Fig. 2i**). Increase in the ATP was  
159 prevented under TNF- $\alpha$  inhibition (**Fig. 2j,k**), suggesting the ATP synthesis follows TNF- $\alpha$   
160 secretion. Next, we tested whether the excitability of Purkinje neurons is modulated by bath-  
161 application of ATP with various concentrations (10–100  $\mu\text{M}$ ) (**Fig. 2l–n**). The firing frequency did  
162 not increase upon exposure to ATP (20–60  $\mu\text{M}$ ,  $p > 0.1$ ) (**Fig. 2l,n**). Additionally, even under the  
163 purinergic receptor (P2R) inhibitor PPADS, firing frequency was increased upon exposure to LPS  
164 ( $*p < 0.05$ ) (**Fig. 2o**).

165

166 **Facilitation of synaptic transmission following microglial activation**

167           Regarding the effect of endotoxin exposure in synapses, we examined whether LPS  
168 administration alters spontaneous excitatory postsynaptic currents (sEPSCs). Results indicated no  
169 change in postsynaptic responsiveness in Purkinje neurons, except for a reduction in PPADS+LPS  
170 group (**Fig. 3a–d**). However, administration of heat-killed Gram-negative bacteria, TNF- $\alpha$ , or ATP  
171 produced a significant increase in sEPSC frequency (**Fig. 3e,f**). Our findings suggest that activated  
172 MG prompted vesicular release from presynaptic neurons, depending on both TNF- $\alpha$  and ATP.  
173 Extracellular ATP may increase in vesicular release via purinergic receptors on presynaptic neurons.  
174 In fact, in MG-depleted cerebella, there were no significant differences among MG-depleted control,  
175 LPS, and HKGn exposure groups in amplitude or in frequency, indicating the involvement of certain  
176 mediators from MG (**Supplementary Fig. 6**).

177

#### 178 **Endotoxin-TLR4-TNF- $\alpha$ signal involvement in the hyperexcitability**

179           Next, we investigated whether the endotoxin receptors involved in MG-associated signaling.  
180 LPS is classically known to bind complement receptor 3 in immune cells<sup>23,24</sup>. Zhang et al.<sup>11</sup> revealed  
181 that application of LPS under hypoxic conditions resulted in the release of superoxide anion via  
182 complement receptor and NADPH oxidase activity. Here, we applied LPS in the presence of  
183 apocynin, an NADPH oxidase inhibitor. However, we observed no suppression of firing increases  
184 (\* $p < 0.03$ ) (**Fig. 4a**), implying that neither superoxide nor the complement receptor pathway are  
185 involved in the induction of excitability plasticity.

186           The Toll-like receptor (TLR) family comprises pattern recognition receptors that are  
187 abundantly expressed on the surface of immune cells. The extracellular domain of leucine-rich  
188 repeats of TLR4 specifically recognize LPS<sup>25</sup>, and its dimerized complex is thought to trigger the  
189 intracellular signaling cascade. We examined MG signaling using pharmacology and transgenic  
190 animals. Under the suppression of TLR4 by C34, LPS exposure did not cause the change in firing  
191 frequency ( $p > 0.1$ ) (**Fig. 4b**). While exposure of TLR4-knockout cerebellar slices to LPS and HKGn



192 abolished the induction of firing increase (**Fig. 4c,d**), Purkinje neurons in TLR2-knockout mice  
193 showed an increase in firing sustainably (**Fig. 4e**), suggesting that TLR4 but not TLR2 is essential  
194 for the observed responses (**Supplementary Fig. 7a,b**). We next aimed to determine the downstream  
195 of TLR4 using knockout mice for myeloid differentiation primary response gene 88 (MyD88) and  
196 Toll/IL-1 receptor (TIR)-domain-containing adapter-inducing interferon- $\beta$  (TRIF). While MyD88 is  
197 a TIR domain-containing adapter common in TLR signaling pathways, TRIF mediates the MyD88-  
198 independent pathway as the downstream of TLR3 and TLR4<sup>24</sup>. Both are involved in inflammatory  
199 cytokine release in macrophages and MG. In MyD88- and TRIF-knockout mice, no significant  
200 difference was observed in firing frequency between LPS-treated and untreated neurons  
201 (**Supplementary Fig. 7c,d**) nor in firing properties (**Supplementary Table 2**). In addition, LPS  
202 exposure did not produce long-lasting firing increases (both,  $p > 0.7$ ) (**Fig. 4f,g**), suggesting that both  
203 pathways in MG for the excitability plasticity induction. While, in MG, the precise machinery  
204 underlying the exocytosis of inflammatory cytokines remains obscure, a certain molecule  
205 downstream of both signals may prime the secretion of soluble TNF- $\alpha$ , as illustrated in a summary  
206 cascade of the endotoxin-induced excitability plasticity in the cerebellum (**Fig. 4h, Supplementary**  
207 **Fig. 8 and Supplementary Fig. 9**).

208

### 209 **Depressive behaviors of animals with cerebellar inflammation**

210 To reveal the *in vivo* physiological significance of excess immune activity in the cerebellum,  
211 we observed animals' behavior after bacterial endotoxin infusion in anterior lobes of the cerebellar  
212 vermis. Unexpectedly, we found that the spatial exploratory behavior of freely moving rats in an  
213 open field was significantly reduced by LPS (1 mg/mL)- and HKGn (HKEB+HKPA,  $10^9$  cells/mL  
214 for each)-administration (**Fig. 5a,b and Supplementary Video 1**). In social interaction test, LPS-  
215 and HKGn-injected rats exhibited considerably less interest in siblings (**Fig. 5c**). Immobility time  
216 during a forced swim test became significantly elongated than that in control PBS-injected animals

217 (**Fig. 5d**). These results suggest that the behavior of animals with cerebellar injection is depression-  
218 like or abulic, in contrast to autistic behaviors in animals with less excitable Purkinje neurons<sup>26,27</sup>. To  
219 examine the extent of repetitive movements, we conducted marble burying test and found that rats  
220 with cerebellar bacterial endotoxin infusion showed less burying behavior (**Fig. 5e** and  
221 **Supplementary Fig. 10**). Animals with cerebellar injection did not show significant motor  
222 discoordination or ataxia (**Supplementary Fig. 11a,b**). And, the behavioral modulation lasted only  
223 until the following day (**Supplementary Fig. 11c**). Magnetic resonance (MR) fluid-attenuated  
224 inversion recovery (FLAIR) images clearly showed inflammation at the restricted position of the  
225 HKGn-injection (**Fig. 5f**). In addition, animals subjected to LPS in cerebellar hemispheres showed  
226 no reduction of exploratory behavior (**Supplementary Fig. 11d**). We further recorded Purkinje-  
227 neuron activity following the drug injection, and we observed a significant increase in the firing  
228 frequency of neurons from LPS- and HKGn-injected cerebella (**Supplementary Fig. 12**). Taken  
229 together, hyperexcitability in the cerebellum through region-specific inflammation caused a  
230 reduction of the psychomotor activity.

231

### 232 **Recovery of behavioral disturbances by immune suppression**

233        Provided that activated MG secrete molecules during inflammation *in vivo*, microinfusion of  
234 such molecules may suffice to modulate animal behavior. We next applied TNF- $\alpha$  (20  $\mu$ g/mL) and  
235 ATP (20 mM) into the cerebellar anterior lobes, and found that TNF- $\alpha$ , but not ATP, reduced  
236 behaviors (**Supplementary Fig. 13**). This result indicates that suppression of TNF- $\alpha$  should help to  
237 reduce the animals' psychomotor depressiveness. In fact, co-injections of HKGn with C87 (2–4 mM)  
238 into the anterior lobes of the cerebellar vermis showed a clear recovery of impairment of  
239 psychomotor behaviors (**Fig. 5a–e** and **Supplementary Video 1**, HKGn+C87), as well as  
240 inflammation (**Fig. 5f**, HKGn+C87) and neuronal excitability (**Supplementary Fig. 12**,  
241 HKGn+C87). Further, we speculated that the MG-depletion may also cancel the psychomotor-

242 depressiveness by endotoxin, and the results obtained in Ki20227-administered animals proved that  
243 this was really the case (**Fig. 5a–e**, dMG+LPS). Together, these striking effects of endotoxin infusion  
244 were substantially rescued by both co-injection with TNF- $\alpha$  inhibitor and MG-depletion  
245 (**Supplementary Fig. 14**).

246 In addition, to investigate the causality of the abnormal behaviors, we conducted functional  
247 MR imaging (fMRI) of resting-state animals, which showed a distinct enhancement of correlated  
248 signals among the HKGn-infused cerebellar anterior vermis and frontal neocortical areas, including  
249 the medial prefrontal cortex (mPf), cingulate cortex (Cg), and primary motor cortex (M1) (**Fig. 5g–i**  
250 and **Supplementary Fig. 15**). And, these functional overconnectivity caused by cerebellar  
251 inflammation (*i.e.*, hyperexcitation in the cerebellar cortex) was reverted by the TNF- $\alpha$  inhibition  
252 (**Fig. 5g,h**, HKGn+C87), suggesting that the modulation of the long-range connectivity between the  
253 cerebellar vermis and prefrontal areas may relate to the animal behavioral impairments.

254

255

## 256 **Discussion**

257 The results of the present study indicate that activated MG elicit the induction of long-term  
258 potentiation of intrinsic excitability in cerebellar Purkinje neurons. We observed that both  
259 pharmacological suppression and depletion of MG activity by a CSF1 receptor inhibitor (Ki20227)  
260 and minocycline abolished firing increases by exposure to endotoxin or heat-killed Gram-negative  
261 bacteria, suggesting that MG are involved in the induction of the excitability plasticity (**Fig. 1m,n**  
262 and **Supplementary Fig. 3**). And, our results suggest that endotoxin-induced plasticity of the  
263 intrinsic excitability share molecular signaling via down-regulation of SK channels in neurons  
264 (**Supplementary Fig. 1** and **Fig. 1h,i**). To our knowledge, the present study is the first to  
265 demonstrate increases in excitability in soma and dendrites following transient exposure of CNS  
266 neurons to an endotoxin. We also demonstrated that this excitability plasticity is distinctly mediated

267 by translation-independent release of TNF- $\alpha$  via TLR4, and we showed the downstream molecules  
268 as MyD88 and TRIF in MG (**Fig. 2, Fig. 4** and **Supplementary Fig. 4**). Moreover, the direct  
269 injection of bacterial endotoxin into cerebella diminished several types of behaviors of living animals  
270 due to functional overconnectivity, which was recovered by both TNF- $\alpha$  inhibition and MG-  
271 depletion. This was confirmed by FLAIR MR images of inflammation in the cerebellum (**Fig. 5**).

272 The excitability plasticity of the cerebellar Purkinje neurons is considered to be mediated by  
273 M1 MG. Macrophages secrete TNF- $\alpha$  rapidly upon their activation, through non-constitutive  
274 pathway<sup>28</sup>. Thus, the mediator release in relatively rapid time scale from activated MG may explain  
275 the time course of increase in firing against the exposure to LPS or HKGn (**Fig. 1d,g**) and the  
276 translation-independency of the plasticity induction (**Supplementary Fig. 4**). In fact, our results of  
277 the increase in TNF- $\alpha$  release at least within 20 minutes from western blotting support this notion  
278 (**Fig. 2f,g**). On the other hand, previous studies have shown that glial TNF- $\alpha$  signaling induces  
279 trafficking of ionotropic receptors at synapses<sup>12,13</sup>. These trafficking mechanisms of ion-channel  
280 receptors underlie protein phosphatase activity. Our results of cerebellar microglia-neuron interaction  
281 via TNF- $\alpha$  also suggest the involvement of phosphatase activation for SK channel down-regulation  
282 following to TNF receptors in Purkinje neurons (**Fig. 2e**). While TNF- $\alpha$  does not solely target the  
283 neuronal membrane, secreted TNF- $\alpha$  is also known to modulate presynaptic transmission via TNF  
284 receptors on astrocytes<sup>14,15</sup>. Bergmann glia, a type of astrocytes in the cerebellum, may also promote  
285 presynaptic release following TNF- $\alpha$  stimulation. Although our finding regarding the increase in  
286 sEPSC frequency (**Fig. 3e,f**, TNF- $\alpha$ ) is consistent with this scenario, it's beyond our scope to address  
287 it.

288 ATP is a gliotransmitter released from neocortical and hippocampal astrocytes upon their  
289 Ca<sup>2+</sup> activity<sup>29,30</sup>. And, intriguingly, astrocytic ATP in the medial prefrontal cortex mediates the  
290 antidepressant-like effects through P2X receptors<sup>31</sup>. While several types of cells locate in the  
291 cerebellum, none of precisely imaged data regarding the ATP source had been presented. Our ATP-

292 imaging (**Fig. 2h–k**) clearly showed that the ATP concentration was increased during the exposure to  
293 endotoxin in the ML of the cerebellar cortex, but not in the GL, suggesting the distinct source of  
294 ATP in the cerebellum. Cell-level images also suggest that the increase in ATP occurs not in  
295 interneurons in the ML, Purkinje cell bodies and dendrites, granule cells, interneurons in the GL or  
296 bundles in the white matter (**Supplementary Fig. 5a–g**). And, our pharmacological TNF-inhibition  
297 substantially prevented such ATP increase, which suggests the TNF- $\alpha$  secretion from MG is a trigger  
298 for the ATP synthesis or its amplification in the ML (**Fig. 2j,k**). Together, the major ATP source in  
299 response to the immune triggering is suggested to be Bergman glia or other cells in the ML from our  
300 imaging with the new ATP-probe.

301       Previously, in response to LPS administration ATP has been shown to facilitate the  
302 presynaptic release through P2Y receptors in the hippocampal slices<sup>10</sup> without TNF- $\alpha$  involvement,  
303 which is in agreement with our result of the increase in sEPSC frequency by sole ATP administration  
304 (**Fig. 3e,f**, ATP). While, in the cerebellum, ATP acts as a diffusible trigger of Ca<sup>2+</sup> waves through  
305 P2Rs in Bergman glial processes<sup>32</sup>, it was shown that such Bergmann glial Ca<sup>2+</sup> activity itself does  
306 not modulate presynaptic release from the glutamatergic excitatory terminals at least on the short  
307 time scale<sup>33</sup>. Therefore, ATP-induced Ca<sup>2+</sup> activity in Bergmann glia and following astrocytic Ca<sup>2+</sup>-  
308 dependent messengers may not relate to the increase in sEPSC. Instead, from our results, immune-  
309 triggered ATP release is suggested to increase the sEPSC frequency of Purkinje cells via P2Rs  
310 sustainably (**Fig. 3f**, PPADS+LPS).

311       Activated MG release not only TNF- $\alpha$  and purines (ATP and GTP), but also other  
312 inflammatory cytokines (IL-1 $\beta$  and IL-6), trophic factors (brain-derived neurotrophic factor), and  
313 ROS including superoxide and nitric oxide<sup>1-5,8-11,23</sup>. The results of our electrophysiological  
314 experiments suggest that ATP and ROS are not involved in the induction of intrinsic excitability  
315 increase (**Fig. 2i** and **Fig. 4a**). Rather, considering the reduction of firing frequency of at high ATP  
316 concentrations, cerebellar MG could regulate neuronal excitability in bimodal direction through

317 TNF- $\alpha$  and ATP<sup>3</sup> in a local region. It is also possible that other inflammatory cytokines are involved  
318 in this process. Although IL-1 $\beta$  has been shown to prevent the long-term potentiation (LTP) of  
319 population spikes in the hippocampal CA1 region<sup>34</sup>, inhibition of IL-1 $\beta$  receptors prevents the  
320 maintenance of LTP of population spikes<sup>35</sup>. Interestingly, microglia-specific transcriptomic data  
321 suggest changes in gene profile after lesion<sup>6</sup>, and thus, the modulation of neuronal activity would be  
322 up to the history of tissue MG. While the relevance of this phenomenon to the late phase of intrinsic  
323 plasticity should be examined, our results of western blotting suggest that the protein level of both  
324 IL-1 $\beta$  and IL-6 was scarce to detect in response to the acute exposure to LPS in the cerebellum (**Fig.**  
325 **2f**).

326 The cerebellum is the principal regulator of motor coordination, timing, and adaptation<sup>36-39</sup>.  
327 The vestibular cerebellum for eye movements and reflections, whereas the anterior vermis of the  
328 cerebellum has been thought to relate to autonomic nervous system<sup>40,41</sup>. Recently, researchers have  
329 started targeting its cognitive functions<sup>26,36,42-44</sup>, and clinical studies have been suggesting  
330 involvement of the cerebellum in psychiatric disorders, potentially via dysmetria of thought,  
331 manifested by autism spectrum disorders, dyslexia, and schizophrenia<sup>27,44,45</sup>. Akinetic mutism or  
332 abulia are also frequently observed after surgical operation of cerebellar astrocytoma or  
333 medulloblastoma<sup>46</sup>, suggesting the disruption of connections in regions responsible to speech and  
334 motivation through the cerebellar vermis during postoperative inflammation. Histological studies  
335 have proved anatomical connection between the cerebellum and neocortex<sup>47,48</sup>. Through evolution,  
336 both regions experienced volume expansion correlatively<sup>49</sup>, and thus, such connections may  
337 contribute to a wide range of cognitive functions. Here, our present results clarify not only the  
338 mechanism of MG-induced hyperexcitability in the cerebellar circuit, but also the psychomotor  
339 depressiveness resulting from functional overconnectivity in cerebello-frontal projections (**Fig. 5i**).  
340 TNF- $\alpha$  secretion from activated MG appears to be a potential target for suppressing symptoms

341 associated with high cytokine conditions in the inflamed cerebellum that can cause dysfunctional  
342 communication (**Supplementary Fig. 14**).

343

344 **Acknowledgments**

345 We thank C. Hansel, M. Mitsuyama, P. Hemant, K. Fujita and T. Hirano for invaluable  
346 comments on the manuscript and discussions, and the Hakubi-center members for helpful  
347 discussions, and H. Tanaka for laboratory support. We thank T. Matsui and T. Matsuda for  
348 comments and helpful suggestions regarding rs-fMRI analyses and experiments. We thank Y. Itakura  
349 and M. Taguchi for assistance with the histology and animal behavior experiments and analyses. We  
350 thank Biorbyt Ltd. for offering the CSF1R inhibitor for research purposes. fMRI was performed at  
351 the Medical Research Support Center, Graduate School of Medicine, Kyoto University, which was  
352 supported by Platform for Drug Discovery, Informatics, and Structural Life Science from the  
353 Ministry of Education, Culture, Sports, Science and Technology, Japan.

354

355 **Author contributions**

356 The funders had no role in study design, data collection and analysis, decision to publish, or  
357 preparation of the manuscript; G.O. designed all of the experiments. G.O. (electrophysiology,  
358 immunostaining, western blotting, and animal behavior), M.Y. (ATP imaging and transgenic mice  
359 generation), M.K. (western blotting and immunostaining), and H.I. (fMRI) performed the  
360 experiments. G.O. (electrophysiology, ATP imaging, immunostaining, animal behavior, and fMRI),  
361 M.Y. (ATP imaging), and H.I. (fMRI) analysed the data. G.O. and M.K. wrote the manuscript; the  
362 authors declare no competing interests.

363 This work was supported by grants from the Kowa Life Science Foundation, the Japanese  
364 Society for Promotion of Science (KAKENHI, Grant-in-Aid for Young Scientists (A) 26710002), the  
365 Brain Science Foundation, the Tokyo Biochemical Research Foundation, the Naito Foundation, and  
366 the Hakubi-project grant (Kyoto University) (all to G.O.). The funders had no role in study design,  
367 data collection and analysis, decision to publish, or preparation of the manuscript. All data is  
368 available in the main text or the supplementary materials.



369

370 **Competing interests**

371 We have no competing interests that should be declared in this study.

372

373 **Additional Information**

374 Reprints and permissions information is available at [www.nature.com/reprints](http://www.nature.com/reprints). Correspondence and

375 requests for materials should be addressed to G.O.

376

377

378 **References**

- 379 1. Saijo, K. & Glass, C. K. Microglial cell origin and phenotypes in health and disease. *Nat. Rev.*  
380 *Immunol.* **11**, 775-787 (2011).
- 381 2. Aguzzi, A., Barres, B. A. & Bennett, M. L. Microglia: scapegoat, saboteur, or something else?  
382 *Science* **339**, 156-161 (2013).
- 383 3. Yirmiya, R., Rimmerman, N. & Reshef, R. Depression as a microglial disease. *Trends Neurosci.*  
384 **38**, 637-658 (2015).
- 385 4. Xanthos, D. N. & Sandkühler, J. Neurogenic neuroinflammation: inflammatory CNS reactions in  
386 response to neuronal activity. *Nat. Rev. Neurosci.* **15**, 43-53 (2014).
- 387 5. Chung, W. S., Welsh, C. A., Barres, B. A. & Stevens, B. Do glia drive synaptic and cognitive  
388 impairment in disease? *Nat. Neurosci.* **18**, 1539-1545 (2015).
- 389 6. Tay, T. L. *et al.* A new fate mapping system reveals context-dependent random or clonal  
390 expansion of microglia. *Nat. Neurosci.* **20**, 793-803 (2017).
- 391 7. Paolicelli, R. C. *et al.* Synaptic pruning by microglia is necessary for normal brain development.  
392 *Science* **333**, 1456-1458 (2011).
- 393 8. Parkhurst, C. N. *et al.* Microglia promote learning-dependent synapse formation through BDNF.  
394 *Cell* **155**, 1596-1609 (2013).
- 395 9. Prinz, M. & Priller, J. The role of peripheral immune cells in the CNS in steady state and disease.  
396 *Nat. Neurosci.* **20**, 136-144 (2017).
- 397 10. Pascual, O., Ben Achour, S., Rostaing, P., Triller, A. & Bessis, A. Microglia activation triggers  
398 astrocyte-mediated modulation of excitatory neurotransmission. *Proc. Natl. Acad. Sci. USA.* **109**,  
399 E197-205 (2012).
- 400 11. Zhang, J. *et al.* Microglial CR3 activation triggers long-term synaptic depression in the  
401 hippocampus via NADPH oxidase. *Neuron* **82**, 195-207 (2014).

- 402 12. Beattie, E. C. *et al.* Control of synaptic strength by glial TNF $\alpha$ . *Science* **295**, 2282-2285  
403 (2002).
- 404 13. Pribiag, H. & Stellwagen, D. TNF- $\alpha$  downregulates inhibitory neurotransmission through protein  
405 phosphatase 1-dependent trafficking of GABA(A) receptors. *J. Neurosci.* **33**, 15879-15893 (2013).
- 406 14. Santello, M., Bezzi, P. & Volterra, A. TNF $\alpha$  controls glutamatergic gliotransmission in the  
407 hippocampal dentate gyrus. *Neuron* **69**, 988-1001 (2011).
- 408 15. Habbas, S. *et al.* Neuroinflammatory TNF $\alpha$  Impairs Memory via Astrocyte Signaling. *Cell* **163**,  
409 1730-1741 (2015).
- 410 16. Belmeguenai, A. *et al.* Intrinsic plasticity complements long-term potentiation in parallel fiber  
411 input gain control in cerebellar Purkinje cells. *J. Neurosci.* **30**, 13630-13643 (2010).
- 412 17. Ohtsuki, G., Piochon, C., Adelman, J. P. & Hansel, C. SK2 channel modulation contributes to  
413 compartment-specific dendritic plasticity in cerebellar Purkinje cells. *Neuron* **75**, 108-120 (2012).
- 414 18. Grasselli, G. *et al.* Activity-Dependent Plasticity of Spike Pauses in Cerebellar Purkinje Cells.  
415 *Cell Rep.* **14**, 2546-2553 (2016).
- 416 19. Ohtsuki, G. & Hansel, C. Synaptic Potential and Plasticity of an SK2 Channel Gate Regulate  
417 Spike Burst Activity in Cerebellar Purkinje Cells. *iScience* **1**, 49-54 (2018).
- 418 20. Schonewille, M. *et al.* Purkinje cell-specific knockout of the protein phosphatase PP2B impairs  
419 potentiation and cerebellar motor learning. *Neuron* **67**, 618-628 (2010).
- 420 21. Elmore, M. R. *et al.* Colony-stimulating factor 1 receptor signaling is necessary for microglia  
421 viability, unmasking a microglia progenitor cell in the adult brain. *Neuron* **82**, 380-397 (2014).
- 422 22. Ohno, H. *et al.* A c-fms tyrosine kinase inhibitor, Ki20227, suppresses osteoclast differentiation  
423 and osteolytic bone destruction in a bone metastasis model. *Mol. Cancer Ther.* **5**, 2634-2643 (2006).
- 424 23. Kettenmann, H., Hanisch, U. K., Noda, M. & Verkhratsky, A. Physiology of microglia. *Physiol.*  
425 *Rev.* **91**, 461-553 (2011).

- 426 24. Pandey, S., Kawai, T. & Akira, S. Microbial sensing by Toll-like receptors and intracellular  
427 nucleic acid sensors. *Cold Spring Harb. Perspect Biol.* **7**:a016246 (2014).
- 428 25. Park, B. S. *et al.* The structural basis of lipopolysaccharide recognition by the TLR4-MD-2  
429 complex. *Nature* **458**, 1191-1195 (2009).
- 430 26. Tsai, P. T. *et al.* Autistic-like behaviour and cerebellar dysfunction in Purkinje cell Tsc1 mutant  
431 mice. *Nature* **488**, 647-651 (2012).
- 432 27. Stoodley, C. J. *et al.* Altered cerebellar connectivity in autism and cerebellar-mediated rescue of  
433 autism-related behaviors in mice. *Nat Neurosci.* **20**, 1744-1751 (2017).
- 434 28. Murray, R. Z., Wylie, F. G., Khromykh, T., Hume, D. A. & Stow, J. L. Syntaxin 6 and Vti1b  
435 form a novel SNARE complex, which is up-regulated in activated macrophages to facilitate  
436 exocytosis of tumor necrosis Factor- $\alpha$ . *J. Biol. Chem.* **280**, 10478-10483 (2005).
- 437 29. Zhang, Z., *et al.* Regulated ATP release from astrocytes through lysosome exocytosis. *Nat. Cell*  
438 *Biol.* **9**, 945-953 (2007).
- 439 30. Lalo, U., *et al.* Exocytosis of ATP From Astrocytes Modulates Phasic and Tonic Inhibition in the  
440 Neocortex. *PLOS biology* **12**, e1001747 (2014).
- 441 31. Cao, X., *et al.* Astrocyte-derived ATP modulates depressive-like behaviors. *Nat. Med.* **19**, 773-  
442 777 (2013).
- 443 32. Hoogland, T. M., *et al.* Radially expanding transglial calcium waves in the intact cerebellum.  
444 *Proc Natl Acad Sci U S A.* **106**, 3496-3501 (2009).
- 445 33. Beierlein, M. & Regehr, W. G. Brief bursts of parallel fiber activity trigger calcium signals in  
446 bergmann glia. *J. Neurosci.* **26**, 6958-6967 (2006).
- 447 34. Bellinger, F. P., Madamba, S. & Siggins, G. R. Interleukin 1 beta inhibits synaptic strength and  
448 long-term potentiation in the rat CA1 hippocampus. *Brain Res.* **628**, 227-234 (1993).
- 449 35. Schneider, H. *et al.* A neuromodulatory role of interleukin-1beta in the hippocampus. *Proc. Natl.*  
450 *Acad. Sci. USA.* **95**, 7778-7783 (1998).

- 451 36. Ito, M. Control of mental activities by internal models in the cerebellum. *Nat. Rev. Neurosci.* **9**,  
452 304-313 (2008).
- 453 37. De Zeeuw, C. I. & Ten Brinke, M. M. Motor Learning and the Cerebellum. *Cold Spring Harb*  
454 *Perspect Biol.* **7**:a021683 (2015).
- 455 38. Boyden, E. S., Katoh, A. & Raymond, J. L. Cerebellum-dependent learning: the role of multiple  
456 plasticity mechanisms. *Annu. Rev. Neurosci.* **27**, 581-609 (2004).
- 457 39. Inoshita, T. & Hirano, T. Occurrence of long-term depression in the cerebellar flocculus during  
458 adaptation of optokinetic response. *Elife* **7**. pii: e36209 (2018).
- 459 40. Supple, W. F. Jr. & Kapp, B. S. The anterior cerebellar vermis: essential involvement in  
460 classically conditioned bradycardia in the rabbit. *J. Neurosci.* **13**, 3705-3711 (1993).
- 461 41. Reis, D. J., Doba, N. & Nathan, M. A. Predatory attack, grooming, and consummatory behaviors  
462 evoked by electrical stimulation of cat cerebellar nuclei. *Science* **182**, 845-847 (1973).
- 463 42. Witter, L. & De Zeeuw, C. I. Regional functionality of the cerebellum. *Curr. Opin. Neurobiol.* **33**,  
464 150-155 (2015).
- 465 43. Schmahmann, J. D. Disorders of the cerebellum: ataxia, dysmetria of thought, and the cerebellar  
466 cognitive affective syndrome. *J. Neuropsychiatry Clin. Neurosci.* **16**, 367-378 (2004).
- 467 44. Koziol, L. F. *et al.* Consensus paper: the cerebellum's role in movement and cognition.  
468 *Cerebellum* **13**, 151-177 (2014).
- 469 45. Piochon, C. *et al.* Cerebellar plasticity and motor learning deficits in a copy-number variation  
470 mouse model of autism. *Nat. Commun.* **5**:5586 (2014).
- 471 46. Robertson PL. *et al.* Incidence and severity of postoperative cerebellar mutism syndrome in  
472 children with medulloblastoma: a prospective study by the Children's Oncology Group. *J. Neurosurg.*  
473 **105**, 444-451 (2006).
- 474 47. Kelly, R. M. & Strick, P. L. Cerebellar loops with motor cortex and prefrontal cortex of a  
475 nonhuman primate. *J. Neurosci.* **23**, 8432-8444 (2003).

- 476 48. Suzuki, L., Coulon, P., Sabel-Goedknecht, E. H. & Ruigrok, T. J. Organization of cerebral  
477 projections to identified cerebellar zones in the posterior cerebellum of the rat. *J. Neurosci.* **32**,  
478 10854-10869 (2012).
- 479 49. Barton, R. A. & Venditti, C. Rapid evolution of the cerebellum in humans and other great apes.  
480 *Curr. Biol.* **24**, 2440-2444 (2014).
- 481
- 482
- 483

484 **Methods**

485 **Animals.** Male Sprague-Dawley rats and male GO-ATeam2 (*Related study is in preparation for*  
486 *submission*), TLR2<sup>-/-</sup>, TLR4<sup>-/-</sup>, MyD88<sup>-/-50</sup>, and TRIF<sup>-/-51</sup> mice (Oriental Bioservice, Inc., Japan) were  
487 used for the experiments. Animals were housed (5 animals at maximum in each cage) and  
488 maintained under a 12-h light: 12-h dark cycle, at a constant temperature and humidity (20–24°C,  
489 35–55%), with food and water available *ad libitum*. All procedures were performed in accordance  
490 with the guidelines of the Animal Care and Use Committees of the local institution and were  
491 approved by the Ethical Committee of the local institution. All animal handling and reporting  
492 comply with ARRIVE guidelines.

493

494 **Patch-clamp recordings.** *In vitro* patch-clamp recordings were obtained as described previously<sup>16-</sup>  
495 <sup>19</sup>. Sagittal slices of the cerebellar vermis (250 μm) were prepared from Sprague-Dawley rats  
496 (postnatal (P)22–28 days old) after isoflurane anesthesia and decapitation. In some experiments,  
497 TLR2<sup>-/-</sup>, TLR4<sup>-/-</sup>, MyD88<sup>-/-</sup>, and TRIF<sup>-/-</sup> mice (P2-month-old) were used. Slices were cut on a  
498 vibratome (Dosaka EM, Japan) using ceramic blades. Subsequently, slices were kept in artificial  
499 cerebrospinal fluid (ACSF) containing the following (in mM): 124 NaCl, 5 KCl, 1.25 Na<sub>2</sub>HPO<sub>4</sub>, 2  
500 MgSO<sub>4</sub>, 2 CaCl<sub>2</sub>, 26 NaHCO<sub>3</sub>, and 10 D-glucose, bubbled with 95% O<sub>2</sub> and 5% CO<sub>2</sub>. During cutting,  
501 supplemental ingredients (5 mM Na-ascorbate, 2 mM thiourea, and 3 mM Na-pyruvate) were added  
502 to the ACSF. After at least 1-h, slices were transferred to a recording chamber superfused with ACSF  
503 at near-physiological temperature (32–34°C). The ACSF was supplemented with 100 μM picrotoxin  
504 to block GABA<sub>A</sub> receptors. Patch-clamp recordings were performed under a ×40 water immersion  
505 objective lens equipped with a DIC system (DS-Qi2; Nikon) mounted on a microscope (ECLIPSE  
506 FN1, Nikon). Recordings were performed in voltage-clamp or current-clamp mode using an EPC-10  
507 amplifier (HEKA Elektronik, Germany). Membrane voltage and current were filtered at 2.9 kHz,  
508 digitized at 10 kHz, and acquired using Patchmaster software (HEKA Elektronik). Patch pipettes

509 (borosilicate glass) were filled with a solution containing (in mM): 9 KCl, 10 KOH, 120 K-  
510 gluconate, 3.48 MgCl<sub>2</sub>, 10 HEPES, 4 NaCl, 4 Na<sub>2</sub>ATP, 0.4 Na<sub>3</sub>GTP, and 17.5 sucrose (pH 7.25  
511 titrated with 1 M KOH). Membrane voltage was offset for liquid junction potentials (11.7 mV).  
512 Somatic patch electrodes had electrode resistances of 2–4 MΩ, while dendritic patch electrodes had  
513 electrode resistances of 7–8 MΩ<sup>17</sup>. Hyperpolarizing bias currents (100–400 pA) were injected to  
514 stabilize the somatic membrane potential at approximately -75 to -80 mV and to prevent spontaneous  
515 spike activity. To obtain the firing frequency in response to different levels of depolarization, we  
516 applied 500-ms pulses ranging from 0 to 550 pA every 2 or 3 s, which were increased by 50 pA per  
517 step, and counted the number of simple spike-shaped action potentials. Action potential on dendrites  
518 were recorded by simultaneous patch-clamping from soma and dendrite. Data were collected at  
519 distances of 80–120 μm apart from the soma at secondary and tertiary branches. Due to the lack of  
520 voltage-sensitive Na<sup>+</sup> channels, the amplitude of bAPs attenuates in a distance-dependent manner.  
521 Approximate curves obtained from entire recordings including somatic APs are superimposed to the  
522 plotting of control (blue line) and apamin (red line) experiments in **Fig. 1i**. To examine the  
523 excitability of Purkinje cells from drug-injected cerebella, slices were prepared within 1 h following  
524 injection, and recordings were obtained for 1–4 h. For long-term recording, depolarizing current  
525 steps (100–400 pA/500 ms) were applied every 20 s to the soma to evoke action potentials. In some  
526 experiments, for the conditioning of intrinsic plasticity induction, depolarizing pulses (300–550  
527 pA/100 ms) were applied at 5 Hz for 4 s. We compared firing frequency normalized by 5-min  
528 average before 0 min (*i.e.*, -5 – -1 min) to that of 25 to 30 min later. Input resistance was monitored  
529 by administering 50-pA hyperpolarizing pulses (50-ms duration) following the depolarization. Data  
530 were discarded when the input resistance or the membrane potential had changed more than 20%. All  
531 drugs were applied to the bath chamber via the circulation system.  
532



533 **Electrophysiological data analysis.** Data were analyzed using a custom program written in  
534 MATLAB (Mathworks). For the analysis of action-potential waveforms, we measured the first action  
535 potential evoked by administration of a 200–400-pA depolarizing pulses. Action potential analysis  
536 was performed as described previously<sup>16</sup> (**Supplementary Tables 1 and 2**). For the analysis of  
537 spontaneous EPSC (sEPSC) events, membrane current was held at -71.7 mV or at -81.7 mV only if  
538 the membrane current was jittered, and current was recorded for 1.5 s trials, for at least 180 s in total.  
539 Periods of fluctuation were omitted and supplemented by other trials. Then, a Savitzky-Golay filter  
540 (*sgolayfilt*) was applied to the recorded currents. The event detection threshold for sEPSCs was set at  
541 4.5 pA. Events were defined as those exceeding four standard deviations during the 10 ms pre-  
542 period. We then applied the *fminsearch* function to obtain decay time by a single exponential. If the  
543 current trace at the decay period (limited to 19 ms) was poorly fit, the data were excluded. Rise time  
544 was regarded as the period spanning 10–90% of the change from peak to basement values. Rise time,  
545 half-width, and decay time of sEPSCs were not significantly different against control except for ATP  
546 (*data not shown*). Representative sEPSC traces in **Fig. 3b** are the average from 1571, 946, 1264,  
547 1330, 1132, 1079, 663, 276, 1634, and 619 events of control, LPS, PGN, TNF- $\alpha$ , HKEB, HKPA,  
548 HKSP, minocycline+LPS, ATP, and PPADS+LPS conditions, respectively. For the cumulative  
549 probability in **Fig. 3d** and **3f**, a maximum of 400 sEPSC amplitude and frequency events were  
550 collected from each cell for each experiment.

551

552 **CSF1R inhibitor treatment.** For the sake of pharmacological MG-depletion, the CSF1R inhibitor  
553 Ki20227<sup>21,22</sup> (Biorbyt Ltd., UK) was given to P5-week C57BL/6 mice via the drinking water (100 or  
554 250 mg/L, including 2.5% sucrose) or by oral administration 0.2 mL/day (20 mg/mL dissolved to  
555 10% DMSO and 90% corn oil) for 6–7 days (**Fig. 1j,k** and **Supplementary Fig. 2**). A few mice were  
556 given the inhibitor for 11–12 days for electrophysiological experiments. In some experiments, we  
557 gave Ki20227 0.2 mL/day (oral administration of 20 mg/mL with 10% DMSO and 90% corn oil) to

558 male juvenile Sprague-Dawley rats (38-62 g body weight) from P19–20 for 5 days. Following  
559 reagent administration under specific pathogen free (SPF)-environment, we sacrificed mice for  
560 electrophysiological and immunohistochemical experiments, and we conducted behavior tests with  
561 rats. No obvious behavioral or health problems were observed during the Ki20227 treatment, except  
562 for a reduction of weight in two rats with vulnerability whose data were excluded.

563

564 **Immunohistochemistry.** Immunostaining was performed as described<sup>16</sup>, with some modifications.  
565 After perfusion fixation of the control and Ki20227-treated mice with 4% paraformaldehyde (PFA),  
566 brains were kept in PFA for 2 days at 4°C. After submersion in phosphate buffered saline (PBS)  
567 containing 30% sucrose for 2–4 days, 50- $\mu$ m cryosections were collected in water. Sections were  
568 heated in HistoVT (Nacalai Tesque, Japan) to 80°C for 30 min, rinsed in TBS, and incubated in  
569 blocking solution (TBS containing 10% normal goat serum (NGS) and 0.5% Triton) for 1 h at 20–  
570 24°C. Sections were then incubated with fluorescently conjugated-primary antibodies against Iba1  
571 (rabbit anti-Iba1:red fluorescent probe 635, 1:200 [2.5  $\mu$ g/mL]; Wako) and Calbindin (rabbit anti-  
572 Calbindin:Alexa Fluor® 488, 1:100 [5  $\mu$ g/mL]; Abcam) at 4°C for 48 h. Subsequently, sections were  
573 rinsed three times in PBS for 5 min each and were mounted on glass slides and cover-slipped.  
574 Fluorescence images were obtained using a Zeiss LSM 780, Olympus FV1000 or Olympus FV 3000  
575 confocal laser-scanning microscope equipped with Plan-Apochromat 20 $\times$ /0.8 and 10 $\times$ /0.4 lenses.  
576 Emission wave length for imaging was 488 and 639 nm, and the fluorescence was filtered using 640-  
577 nm low-pass and 490–555-nm band-pass filters. Individual images were taken under a fluorescence  
578 microscope (FV 3000), and the merged-images are shown as whole cerebellar images in  
579 **Supplementary Fig. 2.** For counting the number of MG in **Fig. 1k**, arbitral parts of the cerebellum  
580 were imaged (489.5  $\times$  489.5  $\mu$ m) with z-stacks of 24–30 images at every 1  $\mu$ m, and the density of  
581 MG were calculated from 43–54 regions of interest (ROIs) (from 2 mice per group), excluding white  
582 matter.

583

584 **Western blotting.** Cerebellar slices from Sprague-Dawley rats were prepared as described above.

585 After recovery, brain slices were incubated in normal ACSF or LPS-containing ACSF for 0, 20, or

586 60 min at near-physiological temperature. Supernatants were concentrated with Amicon Ultra-15

587 Centrifugal Filter Units (EMD Millipore) and subjected to immunoblotting analysis using anti-rat

588 TNF- $\alpha$  (BMS175; eBioscience), anti-rat IL-6 (AF506; R&D) and anti-rat IL-1 $\beta$  (AF-501-NA;

589 R&D). Intensity was quantified using Multi Gauge ver.3.2 (Fujifilm). For a control experiment, we

590 used rat macrophage culture (NR8383 [AgC11x3A, NR8383.1], ATCC) (*data not shown*).

591

592 **Reagents.** Apamin, apocynin, cyclosporin A, C34<sup>52</sup>, C87<sup>53</sup>, minocycline hydroxide<sup>54</sup>, PPADS

593 tetrasodium salt, picrotoxin, NBQX disodium salt, anisomycin, and cycloheximide (Tocris); LPS

594 from *E. coli* O26 or O111 (Wako); Ki20227<sup>22</sup> (IC<sub>50</sub> = 2 nM to M-CSF receptor; 451 nM to c-Kit),

595 which is a more potent and specific inhibitor to CSF-1R than PLX3397<sup>55</sup> (IC<sub>50</sub> = 20 nM to M-CSF

596 receptor; 10 nM to c-Kit); okadaic acid (AdipoGen); ATP (Adenosine 5'-triphosphate disodium salt),

597 BAPTA (Sigma-Aldrich); carrier-free recombinant rat TNF- $\alpha$  (R&D Systems); heat-killed bacteria

598 (HKEB, *E.coli* O111:B4; HKPA, *P. aeruginosa*; HKSP, *S. pneumoniae*), and peptidoglycan (PGN,

599 peptidoglycan from *E. coli* O111:B4) were purchased from InvivoGen, and 10<sup>10</sup> freeze-dried cells

600 were diluted to 10<sup>7</sup> or 10<sup>9</sup> cells/mL in sterile, endotoxin-free water.

601

602 **ATP imaging.** An ATP probe (GO-ATeam2) was developed for use in conjunction with green and

603 orange fluorescent proteins as a fluorescence/Förster resonance energy transfer (FRET) pair<sup>56</sup>. We

604 generated GO-ATeam2 transgenic mice to monitor the ATP concentration in living animals. Briefly,

605 we employed a knock-in strategy targeting the Rosa26 locus and the CAG promoter to regulate

606 transcription. We used the GeneArt Seamless Recombination System (Thermo Fisher Scientific) to

607 create GO-ATeam2 knock-in mice. The targeting vector was induced into G4 ES cells with

608 electroporation. The constructs harbored by the ES clones underwent homologous recombination,  
609 which was confirmed by Southern blot analysis using appropriate probes (provided by K. Hoshino  
610 and T. Kaisho, Osaka University), PCR, and qPCR. Male chimeras derived from each ES cell line  
611 were bred with C57BL/6J females, yielding heterozygous F1 offspring (C57BL/6J  $\times$  129  
612 background). P2–3 weeks GO-A<sub>Team2</sub> mice were decapitated after inhalation of 2% isoflurane,  
613 following which whole brains were isolated. The cerebellum was placed in cooled ACSF solution as  
614 described for the electrophysiological experiments. Air stones (#180; Ibuki) were used for aeration  
615 (95% O<sub>2</sub> and 5% CO<sub>2</sub>). Sagittal slices were cut to a thickness of 300  $\mu$ m using a vibratome (VT  
616 1000S; Leica), following which they were maintained for at least 30 min at room temperature in  
617 ACSF solution. FRET imaging was performed on a two-photon microscope (TCS SP8; Leica). The  
618 imaging chamber was set on the stage of the microscope with flowing ACSF solution bubbled with  
619 95% O<sub>2</sub> and 5% CO<sub>2</sub>. LPS (final concentration 12  $\mu$ g/mL) or a mixture of HKEB and HKPA (final  
620 10<sup>7</sup> cells/mL, for each) were added to the ACSF. Exciting light (920 nm, 25 W under objective lens)  
621 was applied, and the molecular layer (ML) and granule cell layer (GL) of the cerebellum were  
622 scanned every 2 min. Images were obtained from individual locations (scanned area size, 550  $\times$  550  
623  $\mu$ m). We used BP525/50 filters for emission, and DM560 and D585/40 filters for excitation  
624 fluorescence separation. IMD images and quantifying images were developed from the fluorescence  
625 images using MetaMorph software (Roper Scientific, Trenton, NJ). FRET signals at the chosen ROI  
626 (whose shape depended on the target area, **Supplementary Fig. 5h**) in the ML and GL were  
627 averaged, and the obtained ratio was applied to the following equation: FRET ratio = 1.52  $\times$   
628 [ATP]<sup>1.7</sup> / ([ATP]<sup>1.7</sup> + 2.22) + 0.44, and then, ATP concentration was calculated. The  
629 coefficients were carefully determined based on two methods. First, mouse embryonic fibroblasts  
630 were obtained from GO-A<sub>Team2</sub> mice. After piercing the fibroblast membrane, we applied different  
631 concentrations of ATP, monitored the FRET ratio, and determined coefficients based on the function  
632 for fitting ATP concentration to the FRET ratio. Second, we performed a luciferase assay of ATP

633 concentration (Tissue ATP assay kit; TOYO B-NET) in fertilized eggs from GO-A<sub>Team2</sub> mice.  
634 Mice were injected with ATP synthetase inhibitors (2DG plus antimycin A), and the time course of  
635 the FRET ratio was monitored. Coefficients obtained by the two methods were substantially  
636 identical, indicating that they were appropriate for use in the present study. Our ATP imaging with  
637 transgenic mice expressing ATP probes monitored the ATP concentration in the cytosol, insomuch  
638 as no specific promoters were tied to the transgene construct. Control fluorescence images were  
639 obtained prior to drug exposure (n = 9 in ML, and n = 10 in GL) and used for subtraction of the  
640 background signal. Following endotoxin exposure, remnants on the tubing and chamber were  
641 cleaned with 80% ethanol for at least 5 min. To visualize the time courses of  $\Delta$ ATP, baseline ATP  
642 was set to zero (-6 to -2 min).

643

644 **Drug injection.** Rats received an injection of 0.20–0.30  $\mu$ L of PBS, LPS (1 mg/mL), a mixture of  
645 heat-killed Gram-negative bacteria (HKEB and HKPA,  $10^9$  cells/mL for each), a TNF- $\alpha$  inhibitor  
646 (C87, 2–4 mM), TNF- $\alpha$  (20  $\mu$ g/mL) and ATP (20 mM) into the vermis or right hemisphere of the  
647 cerebellum. Drugs were injected under anesthesia with 0.9% ketamine (Daiichi Sankyo Co., Ltd.)  
648 and 0.2% xylazine (Bayer AG) (*i.p.*,  $5.3 \pm 0.5$   $\mu$ L/g of body weight, as mean  $\pm$  std.). We started  
649 surgery after animals' breath and pulse were stabilized and the extent of anesthesia was enough,  
650 without corneal reflection, touch, and pinch responses. For vermal injection into cerebella, rats were  
651 fixed to the stereotaxic apparatus and a small hole (300  $\mu$ m radius) was drilled in the skull (2.5 mm  
652 posterior to lambda), following which a microsyringe was inserted forward to the anterior lobule  
653 (3.0–3.5 mm depth at 86°, lobule II–IV)<sup>57</sup>. For injection into the hemispheres, a hole was made at  
654 3.0–3.5 mm posterior to the lambda and around 1.5 mm lateral, putting forward to 4.0 mm depth  
655 with an angle of 60–65°. The wound was sealed with Spongel (Astellas Pharma Inc.), after which the  
656 animal was allowed to rest in a clean cage. A heat-plate was used to maintain body temperature, if  
657 necessary. Rats woke up approximately 40 min after injection of the ketamine/xylazine. We handled

658 animals very carefully and treated them with as little discomfort as possible. After at least 2 h of  
659 recovery, we confirmed that the effects of the anesthesia had dissipated and that no paralysis or  
660 seizures had occurred, following which the behavior test battery (open field test, social interaction  
661 test, forced swim test, marble burying test, retention test on balance beam, and gait analysis) was  
662 initiated. Forced swim test was conducted last in the battery, to avoid the effect of fear conditioning  
663 itself. Gait analysis and retention test on balance bar after recovery revealed no obvious ataxia and  
664 motor discoordination (**Supplementary Fig. 11a,b** and **Supplementary Fig. 13f**).

665

666 **Open field test.** We monitored the spatial exploratory behavior of Sprague-Dawley rats (P22–26  
667 days) weighing 52–86 g and microglia-depleted rats (P24–25 days). After habituation in the  
668 experimental room (1 h), rats were individually placed on the center of the Plexiglas open field arena  
669 ( $72 \times 72 \text{ cm}^2$ , 30 cm high white walls with black floor), following the operation. We monitored the  
670 behavior of freely moving rats for 30 min using a video camera. The distance travelled, resting  
671 period, moving period, and mean speed were compared among the groups. The arena and  
672 surrounding walls were cleaned and deodorized with H<sub>2</sub>O and 70% EtOH before each session.  
673 Exploration behavior was quantified using Smart 3.0 software (Panlab Harvard Apparatus). The  
674 resting state was defined at that during which moving speed fell below the threshold of 2.5 cm/s. A  
675 total of 13, 11, 11, 11, 12, 15, 12, 16, and 11 animals were included in the non-conditioned (NC),  
676 PBS, LPS, heat-killed Gram-negative bacteria mixture (HKGn; HKEB+HKPA), HKGn+C87, TNF-  
677  $\alpha$ , ATP, MG-depleted (dMG)+LPS, and LPS to hemispheres conditions, respectively.

678

679 **Social interaction.** The sociability of rats was tested in a Plexiglas open-field arena ( $72 \times 72 \text{ cm}^2$ , 30  
680 cm high) with small circular wire cages (15 cm in diameter, 20 cm high) in two corners. Animals  
681 were allowed to explore the arena for 3 min to determine the baseline of exploratory behavior against  
682 the novel subjects without social targets. All movements were recorded with video-tracking. We

683 defined a preferred corner area as one area ( $30 \times 36 \text{ cm}^2$  square around a wire cage) where the animal  
684 spent more time during the baseline period. Next, a sibling rat was placed into one cage that was less  
685 preferred during the baseline period, and movements were monitored for another three minutes. In  
686 this social approach model, time spent in the interaction and overall locomotion were compared by  
687 an examiner in a blinded experimental condition. Sociability index was calculated by dividing the  
688 time difference between time spent in the interaction zone and in other areas with and without a  
689 sibling by total time (**Fig. 5c** and **Supplementary Fig. 13c**), as following; Sociability index =  
690  $((T_a^{\text{test}} - T_{\bar{a}}^{\text{test}}) - (T_a^{\text{baseline}} - T_{\bar{a}}^{\text{baseline}})) / T^{\text{total}}$ , where T as the resident time (sec),  $T_a^{\text{test}}$  as time spent  
691 in the area where the sibling caged in the test period,  $T_{\bar{a}}^{\text{test}}$  as time spent out of the area where the  
692 sibling is caged, and  $T^{\text{total}}$  as 180 seconds.  $T_a^{\text{baseline}}$  and  $T_{\bar{a}}^{\text{baseline}}$  are those in the baseline period. In  
693 Fig. 5c, abbreviations are given in the equation of sociability index. A total of 15, 15, 12, 13, 16, 13,  
694 and 16 animals were included in the PBS, LPS, HKGn, HKGn+C87, TNF- $\alpha$ , ATP, and dMG+LPS  
695 conditions, respectively.

696

697 **Forced swim.** FS test were conducted in a 5 L plastic beaker filled with 4.3 L of water (16.5 cm in  
698 diameter, 20-cm-depth,  $24.1 \pm 0.2^\circ\text{C}$ ). Rats were tested swimming for 8 min and video-recorded.  
699 Total duration of immobility, each of which is more than 2 s, in the last 4 min was measured in a  
700 blinded condition. Total of 15, 15, 16, 14, 16, 13, and 16 animals were included in the PBS, LPS,  
701 HKGn, HKGn+C87, TNF- $\alpha$ , ATP, and dMG+LPS conditions, respectively.

702

703 **Marble burying.** Marble burying (MB) is a test for stereotyped repetitive behaviors in rodents  
704 analogous to those observed in autistic phenotypes<sup>58</sup>. MB tests were conducted in a testing cage ( $26$   
705  $\times 18.2 \text{ cm}^2$ , 13-cm-high). Bedding tips as wood shavings were covered to a depth of 3 cm. 20 glass  
706 marbles (17 mm in diameter) were aligned equidistantly in four rows of five marbles each. Spaces  
707 (4–5 cm width) were made for placing animals. At the end of the 20-min test period, rats were

708 carefully removed from the cages. The marble burying score was defined as the following: 1 for  
709 marbles covered >50% with bedding, 0.5 for marbles covered ~50% with bedding, and 0 for marbles  
710 less covered. A total of 24, 16, 15, 16, 13, 15, 13, and 14 animals were included in the NC, PBS,  
711 LPS, HKGn, HKGn+C87, TNF- $\alpha$ , ATP, and dMG+LPS conditions, respectively.

712

713 **Retention test on balance beam.** Time in seconds was measured while rats remained on a wooden  
714 balance beam with 25 mm diameter placed at a height of ~11 cm. Measurement time is 5 minutes  
715 after animals became calm on the beam. Trials in which animals escaped were not analyzed. A total  
716 of 12, 10, 12, 10, 16, 11, 13, and 12 animals were included in the PBS, LPS, HKGn, HKGn+C87,  
717 TNF- $\alpha$ , ATP, dMG+LPS, and LPS to hemispheres conditions, respectively.

718

719 **Gait analysis.** Animals (P23-26) were placed at the end of one directional passageway (8.5 cm in  
720 width and 30 cm in length) with a transparent floor at a height of 13 cm, and they were allowed to  
721 walk straight forward while being recorded with a micro video camera from below. Each animal was  
722 tested three times for walking. Centers of paw positions (forepaws and hind paws) were measured,  
723 and three or four strides lengths for each trial were collected from 6, 6, 6, 7, 6, and 7 rats of PBS,  
724 LPS, HKGn, HKGn+C87, dMG+LPS, and LPS to hemispheres conditions.

725

726 **MR imaging and data analyses.** We used anaesthetized Sprague-Dawley rats as described in the  
727 open field test, with three experimental groups of non-conditioned (NC, n = 13), HKGn-injected  
728 (HKGn, n = 12), and HKGn+C87-injected (HKGn+C87, n = 14) rats. After a 2-h recovery period  
729 from the ketamine and xylazine anesthesia as described above, rats inhaled isoflurane (2% for  
730 induction: 1% for MR imaging (MRI)) in a mixture of 66% air and 34% oxygen at 1.5 L/min with  
731 ventilation, were stabilized by head-holding in a plastic tube, and were monitored for respiratory rate  
732 (52–109 breaths/min) and body temperature (30–34°C). Rats were scanned with a 7.0 T MRI scanner



733 (Bruker BioSpin) with a quadrature transmit-receive volume coil (35 mm inner diameter). Shimming  
734 was performed in a  $20 \times 15 \times 10 \text{ mm}^3$  region by mean of a local MapShim protocol using a  
735 previously acquired field map. Blood-oxygen-level dependent (BOLD) resting state- (rs-)/fMRI time  
736 series were obtained with a single-shot gradient-echo planar imaging (EPI) sequence (repetition time  
737 [TR]/echo time [TE] = 1.0 s/9 ms; flip angle,  $60^\circ$ ; matrix size,  $80 \times 64$ ; field of view [FOV],  $2.5 \times$   
738  $2.0 \text{ cm}^2$ ; 12 coronal slices from top to bottom; slice thickness, 1 mm; slice gap 0 mm) for 6–8 min  
739 with a total 360–480 volumes. Following the EPI sequence twice, high-resolution anatomical images  
740 for each experimental animal were obtained using a 2D multi-slice  $T_2$ -weighted (T2W) fast-spin  
741 echo sequence (RARE) (TR/TE = 3.0 s/36 ms; matrix size,  $240 \times 192$ ; FOV,  $2.5 \times 2.0 \text{ cm}^2$ ; 24  
742 coronal slices; slice thickness, 0.50 mm; slice gap 0 mm; with fat suppression by frequency selective  
743 pre-saturation) under 2.0% isoflurane inhalation. To image the region of inflammation, we used a  
744 fluid attenuation inversion recovery (FLAIR) sequence, which suppresses cerebrospinal fluid effects  
745 on the image (inversion time [TI] = 2.5 s; TR/TE = 10 s/36 ms; matrix size,  $240 \times 192$ ; FOV,  $2.5 \times$   
746  $2.0 \text{ cm}^2$ ; 24 coronal slices; slice thickness, 0.50 mm; slice gap 0 mm; with fat suppression by  
747 frequency selective pre-saturation). Image data from three experiments of NC, HKGn-injected and  
748 HKGn+C87-injected were analyzed with SPM12 (<http://www.fil.ion.ucl.ac.uk/spm>), FSL  
749 (<https://fsl.fmrib.ox.ac.uk/fsl/fslwiki/FSL>), and in-house software written with MATLAB  
750 (MathWorks). We pre-processed imaging data as described previously<sup>59,60</sup>. First, the EPIs were  
751 realigned and co-registered to a template brain using anatomical images. Owing to the lack in open-  
752 source anatomical brain images in young adult rats, we used a representative T2W anatomical image  
753 (P22) as a template brain. Co-registered functional EPIs were normalized to the template and  
754 transformed to a  $151 \times 91 \times 81$  matrix (with spatial resolution of  $0.20 \times 0.20 \times 0.20 \text{ mm}^3$ ) and  
755 smoothed with a Gaussian kernel (full width at half maximum [FWHM], 0.7 mm). We manually  
756 omitted data with motion artefacts (26 scans in total). Imaging data were temporally zero-phase  
757 band-pass filtered to retain low-frequency components (0.01–0.10 Hz) by using the *filtfilt* Matlab

758 function. For a given time series, seed ROIs ( $0.8 \times 0.8 \times 0.6 \text{ mm}^3$ ) in the anterior lobe of the  
759 cerebellar vermis (CbIVm), cerebellar hemispheres (CbIHs), cerebellar dentate nuclei (CbINc),  
760 dorsal hippocampi (Hpc), primary visual cortices (V1), sensory cortices (S1), motor cortices (M1),  
761 cingulate cortices (Cg), medial prefrontal cortices (mPf), centro-medial thalamus (cmThl), and  
762 posterior thalami (pThl) were selected, and the signals in the seed were averaged. For CbIHs, CbINc,  
763 Hpc, V1, S1, M1, Cg, mPf, and pThl, seeds were applied in both right and left hemispheres.  
764 Individual correlation maps (r map at the zeroth lag) were computed by cross-correlation against the  
765 mean seed-signal to signals of all the other voxels. Then, correlation maps were transformed to  
766 normally distributed z scores by Fisher's r-to-z transformation. Z-transformation was used to reflect  
767 the strength of spontaneous correlations more linearly at high r values. The resulting group maps  
768 were thresholded at  $|r| > 0.1$ , followed by a cluster-level multiple comparison correction at a  
769 significance level of  $p < 0.001$  of one-sample t-test with  $K\alpha > 29$  voxels (**Fig. 5g**). Seed-seed  
770 correlation matrices were calculated from all pairs among brain regions for each subject. The  
771 correlation matrix was z-transformed. One-sample *t-test* matrix across experiments were thresholded  
772 at  $p < 0.05$  and were corrected by Benjamini-Hochberg (BH) procedure to avoid the incorrect  
773 rejection of a true null hypothesis (a type I error) with a false discovery rate at  $q = 0.05$ . Mean seed-  
774 seed correlation z-matrix was filtered by the T-matrix from BH procedure and variance corrected  
775 color maps were shown (**Fig. 5h**).

776 For the group independent component analysis (ICA) (**Supplementary Fig. 15**), we used the  
777 MELODIC toolbox in the FSL platform<sup>61,62</sup>. Group ICA was done on the experimental groups (NC,  
778 HKGn, and HKGn+C87) to estimate a common set of components for all three cohorts, using multi-  
779 session temporal concatenation, and we then extracted 40 components from the pre-processed data  
780 described above. The set of spatial maps from the three-cohort-average analysis was used to generate  
781 subject-specific versions of the spatial maps, using dual regression. We then generated average-  
782 spatial maps for each group by one-sample t-test using the randomize function of FSL<sup>63</sup>. The

783 resulting maps were corrected for multiple comparisons using threshold-free cluster enhancement<sup>64</sup>.

784 These representative maps are color-coded as a value of 1-p with a threshold of  $p < 0.01$ .

785

786 **Statistics.** All data are presented as mean  $\pm$  SEM unless otherwise stated. The summary of statistic is  
787 tabulated in **Supplementary Table 3**. Two-sided Mann-Whitney *U*-tests were used to compare data  
788 between two independent groups, except for the following: in **Fig. 1k**, **Fig. 5b–e**, **Supplementary**  
789 **Fig. 11** and **Supplementary Fig. 13**, we used the Kruskal-Wallis test with multiple comparison test,  
790 with Bonferroni method and Fisher's least significant difference procedure, respectively. In **Fig. 1n**  
791 and **Fig. 4c–g**, we used the Wilcoxon signed-rank test between the mean normalized firing frequency  
792 at -1 to -5 min and at +25 to +30 min. In **Fig. 2i** and **2k**, we used the Wilcoxon signed-rank test  
793 between the mean  $\Delta$ ATP at -6 to -2 min and at +20 to +28 min. In **Supplementary Fig. 12b**, we  
794 used the unpaired Student's *t*-test (two-tailed, unequal distribution).  $p < 0.05$  was considered  
795 statistically significant, unless otherwise stated. All boxplot graphs show interquartile range with  
796 centered bars as median. Overlapping red marks on boxes represent mean  $\pm$  SEM. Other thresholds  
797 are provided for each relevant comparison. Outliers in **Fig. 5b** (Total distances (n=3), Mean speed  
798 (n=1), and FS immobility (n=1)) were excluded under assumption of normality by Grubb's test.

799

800 **Reporting Summary.**

801 Further information on experimental design is available in the Nature Research Reporting Summary  
802 linked to this article.

803

804 **Data availability statement.** Source Data that support the findings of this study are available in the  
805 online version of the paper and from the corresponding author upon reasonable request.

806

807 **Code availability.** Custom Matlab code for analyses are available from the corresponding author  
808 upon individual request.

809

810

811 **Methods only references**

- 812 50. Hoshino, K. *et al.* Toll-like receptor 4 (TLR4)-deficient mice are hyporesponsive to  
813 lipopolysaccharide: evidence for TLR4 as the Lps gene product. *J. Immunol.* **162**, 3749-3752 (1999).
- 814 51. Yamamoto, M. *et al.* Cutting edge: a novel Toll/IL-1 receptor domain-containing adapter that  
815 preferentially activates the IFN-beta promoter in the Toll-like receptor signaling. *J. Immunol.* **169**,  
816 6668-6672 (2002).
- 817 52. Neal, M. D. *et al.* Discovery and validation of a new class of small molecule Toll-like receptor 4  
818 (TLR4) inhibitors. *PLOS One* **8**, e65779 (2013).
- 819 53. Ma, L. *et al.* A novel small-molecule tumor necrosis factor  $\alpha$  inhibitor attenuates inflammation in  
820 a hepatitis mouse model. *J. Biol. Chem.* **289**, 12457-12466 (2014).
- 821 54. Tikka, T., Fiebich, B. L., Goldsteins, G., Keinanen, R. & Koistinaho, J. Minocycline, a  
822 tetracycline derivative, is neuroprotective against excitotoxicity by inhibiting activation and  
823 proliferation of microglia. *J. Neurosci.* **21**, 2580-2588 (2001).
- 824 55. DeNardo, D. G. *et al.* Leukocyte complexity predicts breast cancer survival and functionally  
825 regulates response to chemotherapy. *Cancer Discov.* **1**, 54-67 (2011).
- 826 56. Nakano, M., Imamura, H., Nagai, T., & Noji, H. Ca<sup>2+</sup> regulation of mitochondrial ATP synthesis  
827 visualized at the single cell level. *ACS Chem. Biol.* **6**, 709-715 (2011).
- 828 57. Ifuku, M., Hossain, S.M., Noda, M. & Katafuchi, T. Induction of interleukin-1 $\beta$  by activated  
829 microglia is a prerequisite for immunologically induced fatigue. *Eur. J. Neurosci.* **40**, 3253-3263  
830 (2014).
- 831 58. Silverman, J. L., Yang, M., Lord, C. & Crawley, J. N. Behavioural phenotyping assays for mouse  
832 models of autism. *Nat. Rev. Neurosci.* **11**, 490-502 (2010).
- 833 59. Zhan, Y. *et al.* Deficient neuron-microglia signaling results in impaired functional brain  
834 connectivity and social behavior. *Nat. Neurosci.* **17**, 400-406 (2014).

- 835 60. Matsui, T. *et al.* Direct comparison of spontaneous functional connectivity and effective  
836 connectivity measured by intracortical microstimulation: an fMRI study in macaque monkeys. *Cereb.*  
837 *Cortex* **21**, 2348-2356 (2011).
- 838 61. Beckmann, C. F. & Smith, S. M. Tensorial extensions of independent component analysis for  
839 multisubject FMRI analysis. *Neuroimage* **25**, 294-311 (2005).
- 840 62. Zerbi, V., Grandjean, J., Rudin, M. & Wenderoth, N. Mapping the mouse brain with rs-fMRI: An  
841 optimized pipeline for functional network identification. *Neuroimage* **123**, 11-21 (2015).
- 842 63. Winkler, A. M., Ridgway, G. R., Webster, M. A., Smith, S. M. & Nichols, T. E. Permutation  
843 inference for the general linear model. *Neuroimage* **92**, 381-397 (2014).
- 844 64. Smith, S. M. & Nichols, T. E. Threshold-free cluster enhancement: addressing problems of  
845 smoothing, threshold dependence and localisation in cluster inference. *Neuroimage* **44**, 83-98 (2009).
- 846
- 847

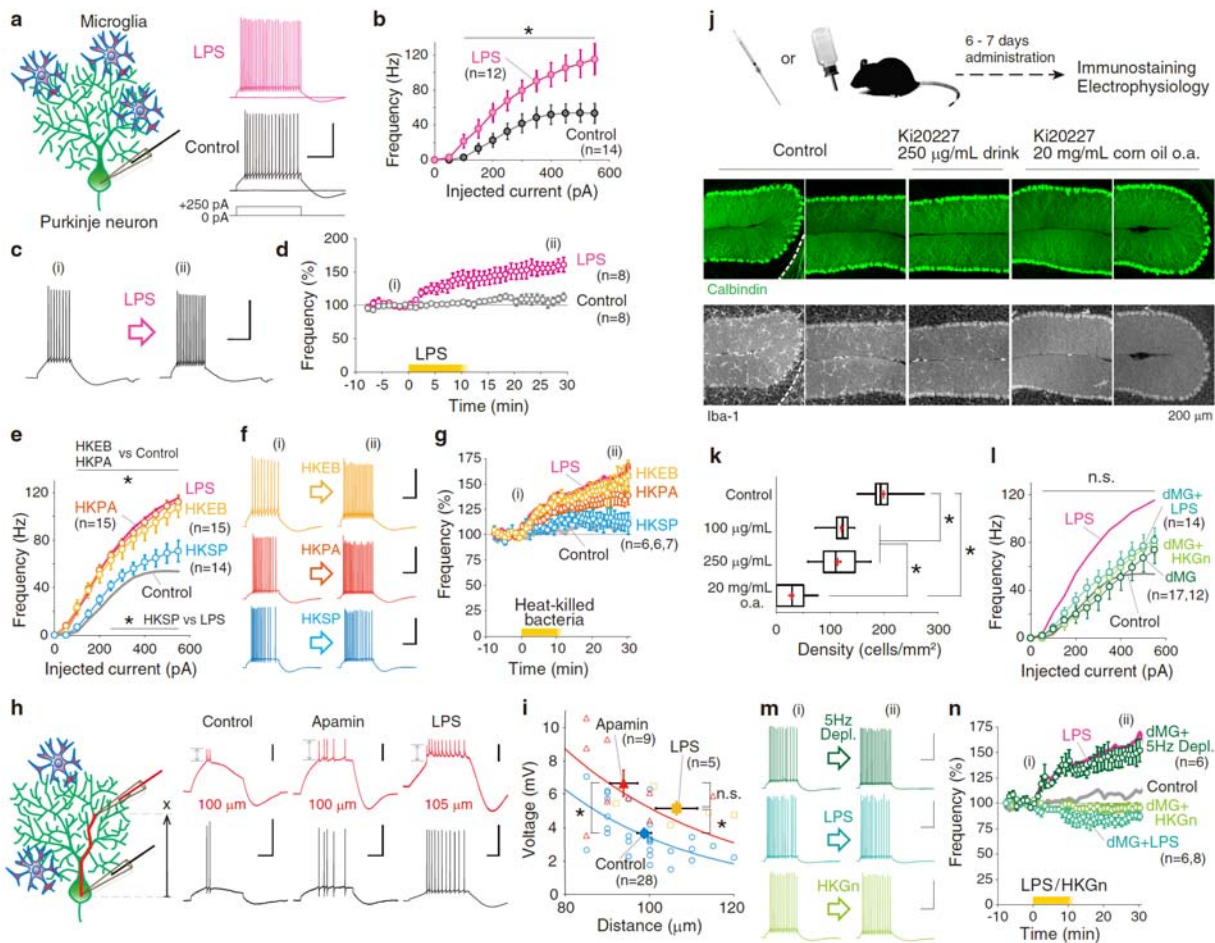

1

2 **Figure 1 | Microglia activation alters excitability in cerebellar neurons. a**, Representative action  
 3 potential (AP) firings of control and LPS (10–12  $\mu\text{g}/\text{mL}$ )-treated Purkinje neurons in response to  
 4 depolarization pulses. **b**, Increase in the firing frequency following bath-application of LPS. **c, d**,  
 5 Representative AP firing before and after LPS exposure ((i) and (ii), respectively), and time courses  
 6 of the normalized frequency. Representative AP traces in (c) were obtained from the corresponding  
 7 time points in (d). **e**, Bath-application of heat-killed Gram-negative ( $10^7$  cells/ml, HKEB and HKPA,  
 8 respectively) but not Gram-positive (HKSP) bacteria increases firing frequency. **f, g**, Representative  
 9 firing and normalized time courses of long-lasting recordings of HKEB, HKPA and HKSP  
 10 application. **h**, Representative AP firings from soma (black) and dendrite (red). Distance of dendrite  
 11 patching (X) is shown below each trace. **i**, Distance-voltage plot of back-propagated APs. **j**,  
 12 Depletion of microglia (MG) by Ki20227-administration for a week. o.a.: oral administration. **k**,

13 Density of MG of control and Ki20227-administered cerebella (\*p < 0.05, Kruskal-Wallis test). **l**,  
14 Suppression of the increase in firing frequency by exposure to LPS and HKGn (heat-killed Gram-  
15 negative bacteria mixture: HKEB+HKPA). **m, n**, Impairment of the excitability increase by exposure  
16 to LPS and HKGn in the MG-depleted cerebella. Time courses of the change in firing frequency  
17 normalized between -5 to -1 min in (d), (g) and (n). Reagents-application began at 0 min and  
18 continued for 10 min. Scale: 40 mV and 200 ms (a, c, f and m), and 5 mV, 40 mV and 100 ms (h).  
19  
20



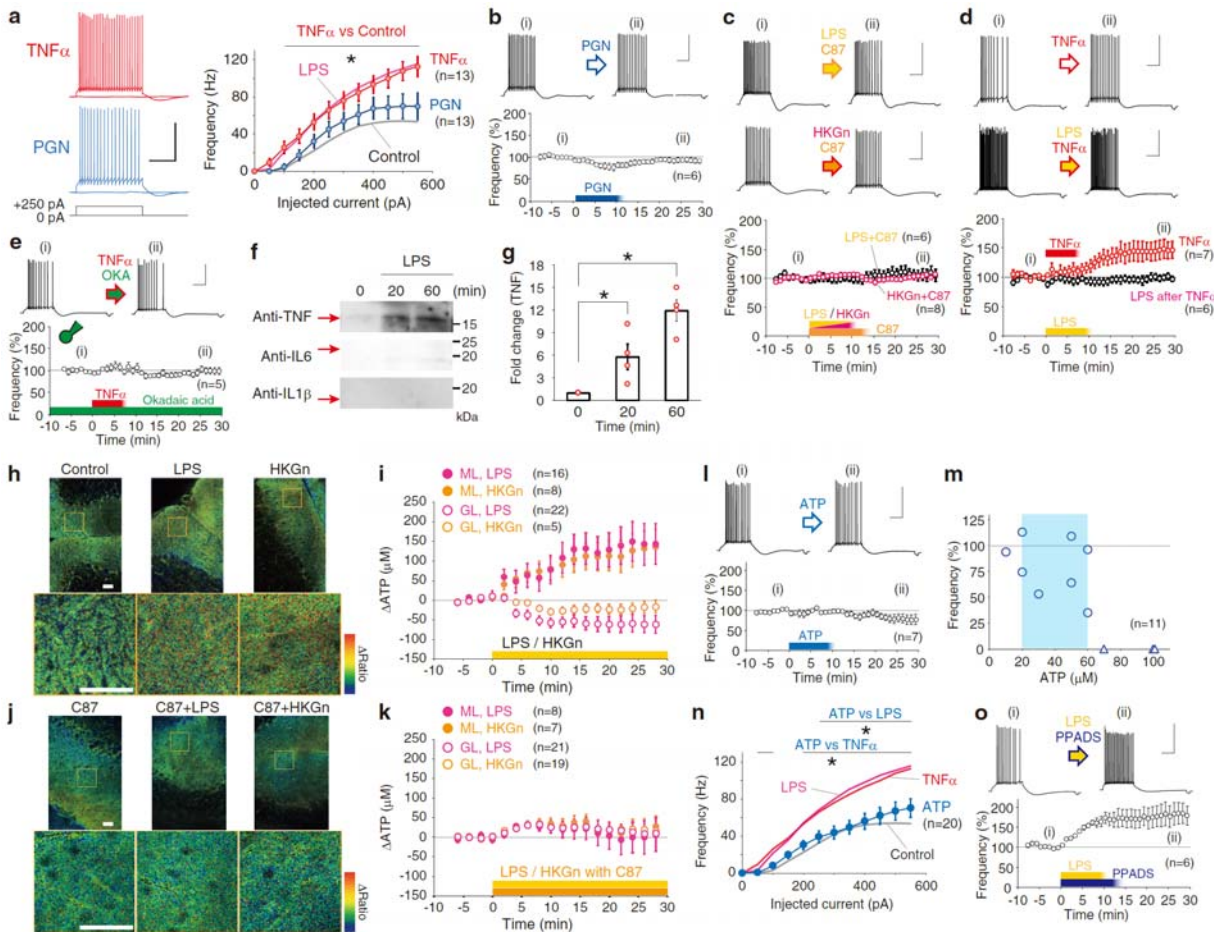

21

22 **Figure 2 | Involvement of microglial mediators in the modulation of neuronal excitability. a,**

23 Firing frequency of Purkinje neurons exposed to TNF- $\alpha$  (100 ng/mL) and PGN (10  $\mu$ g/mL) against

24 depolarization pulses (\* $p < 0.03$ ). Mean firing frequency of LPS-exposed and control neurons are

25 merged for comparison. **b**, PGN-exposure. **c**, Suppression of LPS- and HKGn-induced firing

26 plasticity by TNF- $\alpha$  inhibitor, C87 (40  $\mu$ M). **d**, TNF- $\alpha$  bath-application increased the firing

27 frequency and occluded the effect of LPS. **e**, TNF- $\alpha$ -induced firing frequency increase was abolished

28 by the intra-neuronal okadaic acid (150 nM). **f**, Western blotting of TNF, IL-6 and IL-1 $\beta$  protein in

29 supernatant following LPS exposure for 0, 20, and 60 minutes. **g**, Fold change of TNF-level

30 normalized by at 0 min. **h**, FRET imaging with ATP-probe, ATeam-GO2, shows the increase in ATP

31 in the cerebellar slices. **i**, Time courses of changes in ATP concentration in the molecular layer (ML)

32 and granule cell layer (GL). **j**, **k**, FRET ATP-imaging under TNF- $\alpha$  blocker C87. The ATP increase

33 in ML by endotoxin was abolished by TNF- $\alpha$  inhibition. **l**, 20–60  $\mu$ M ATP exposure. **m**, ATP-firing  
34 change plot indicates a cease of firing in high ATP concentration. **n**, Firing frequency after ATP  
35 administration. **o**, Firing increase was not abolished by P2R inhibitor, PPADS (50  $\mu$ M). All right-  
36 angle scales: 40 mV and 200 ms. Bar scales (h and j): 50  $\mu$ m.

37

38

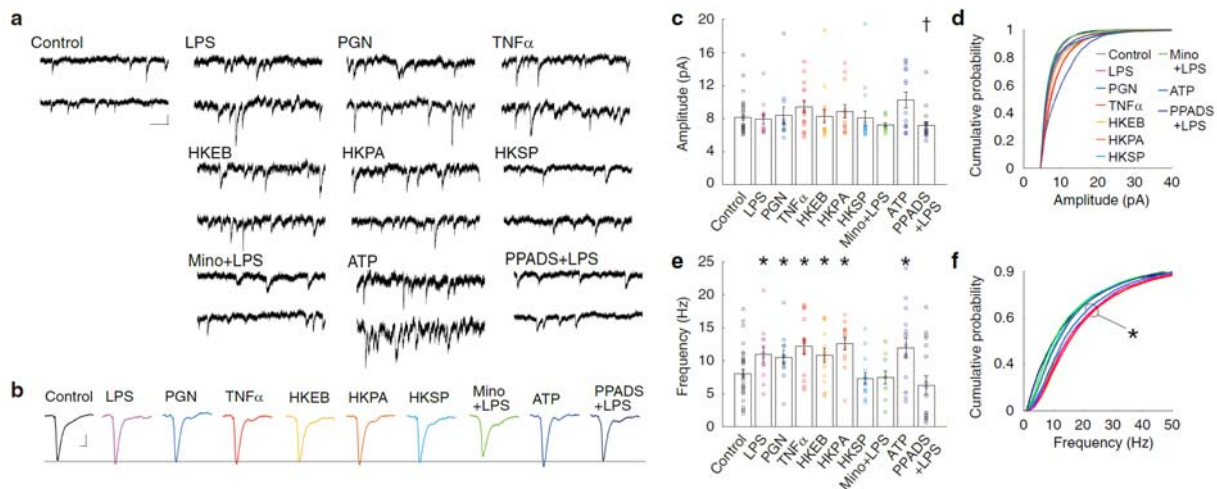

39

40 **Figure 3 | Increase in the release of excitatory synaptic transmissions following microglia**  
41 **activation in both TNF- $\alpha$ - and ATP-dependent manners. a**, Spontaneous EPSC (sEPSC) in  
42 control, LPS, PGN, TNF- $\alpha$ , HKEB, HKPA, HKSP, Minocycline+LPS, ATP and PPADS+LPS.  
43 Scale: 10 pA, 100 ms. **b**, Averaged representative sEPSC. Scale: 2 pA, 10 ms. **c-f**, Bar graphs (mean  
44  $\pm$  SEM) and cumulative probability graphs of amplitude (c, d) and frequency (e, f) of sEPSC in  
45 different experiments. A total of 32, 13, 12, 15, 16, 13, 16, 14, 15, and 18 cells were observed,  
46 respectively. While asterisks indicate a significance increase (Mann-Whitney *U*-test) against the  
47 control condition, a dagger indicates the decrease. Suppression of the increase in sEPSC-frequency  
48 by PPADS suggests the involvement of P2R channels.

49

50

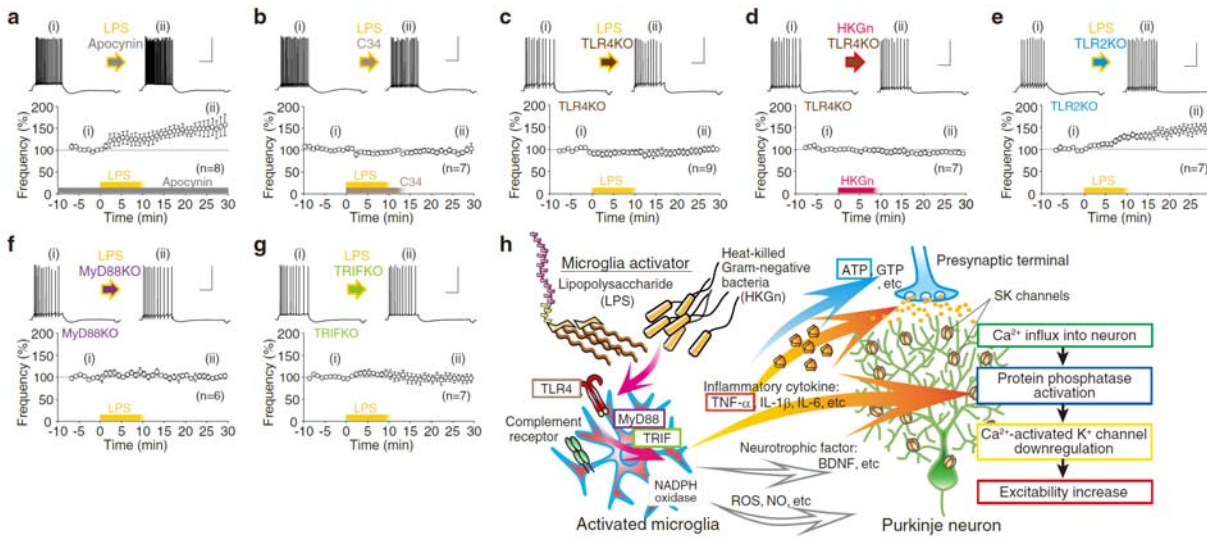

51

52 **Figure 4 | Endotoxin-TLR4-TNF- $\alpha$  signal involvement of the excitability increase plasticity by**

53 **microglia activation. a**, Firing increase by LPS under a nicotinamide adenine dinucleotide

54 phosphate (NADPH)-oxidase inhibitor, apocynin (100  $\mu$ M). **b**, LPS-induced firing increase plasticity

55 was abolished by Toll-like receptor 4 (TLR4) blocker, C34 (40  $\mu$ M). **c-e**, Impairment of the

56 excitability plasticity in TLR4 KO mice but not in TLR2 KO. **f, g**, Impairment of the excitability

57 plasticity in transgenic mice lacking TLR4 downstream proteins MyD88 and TRIF. Scales are 40

58 mV and 200 ms. **h**, Summary of signaling cascade.

59

60

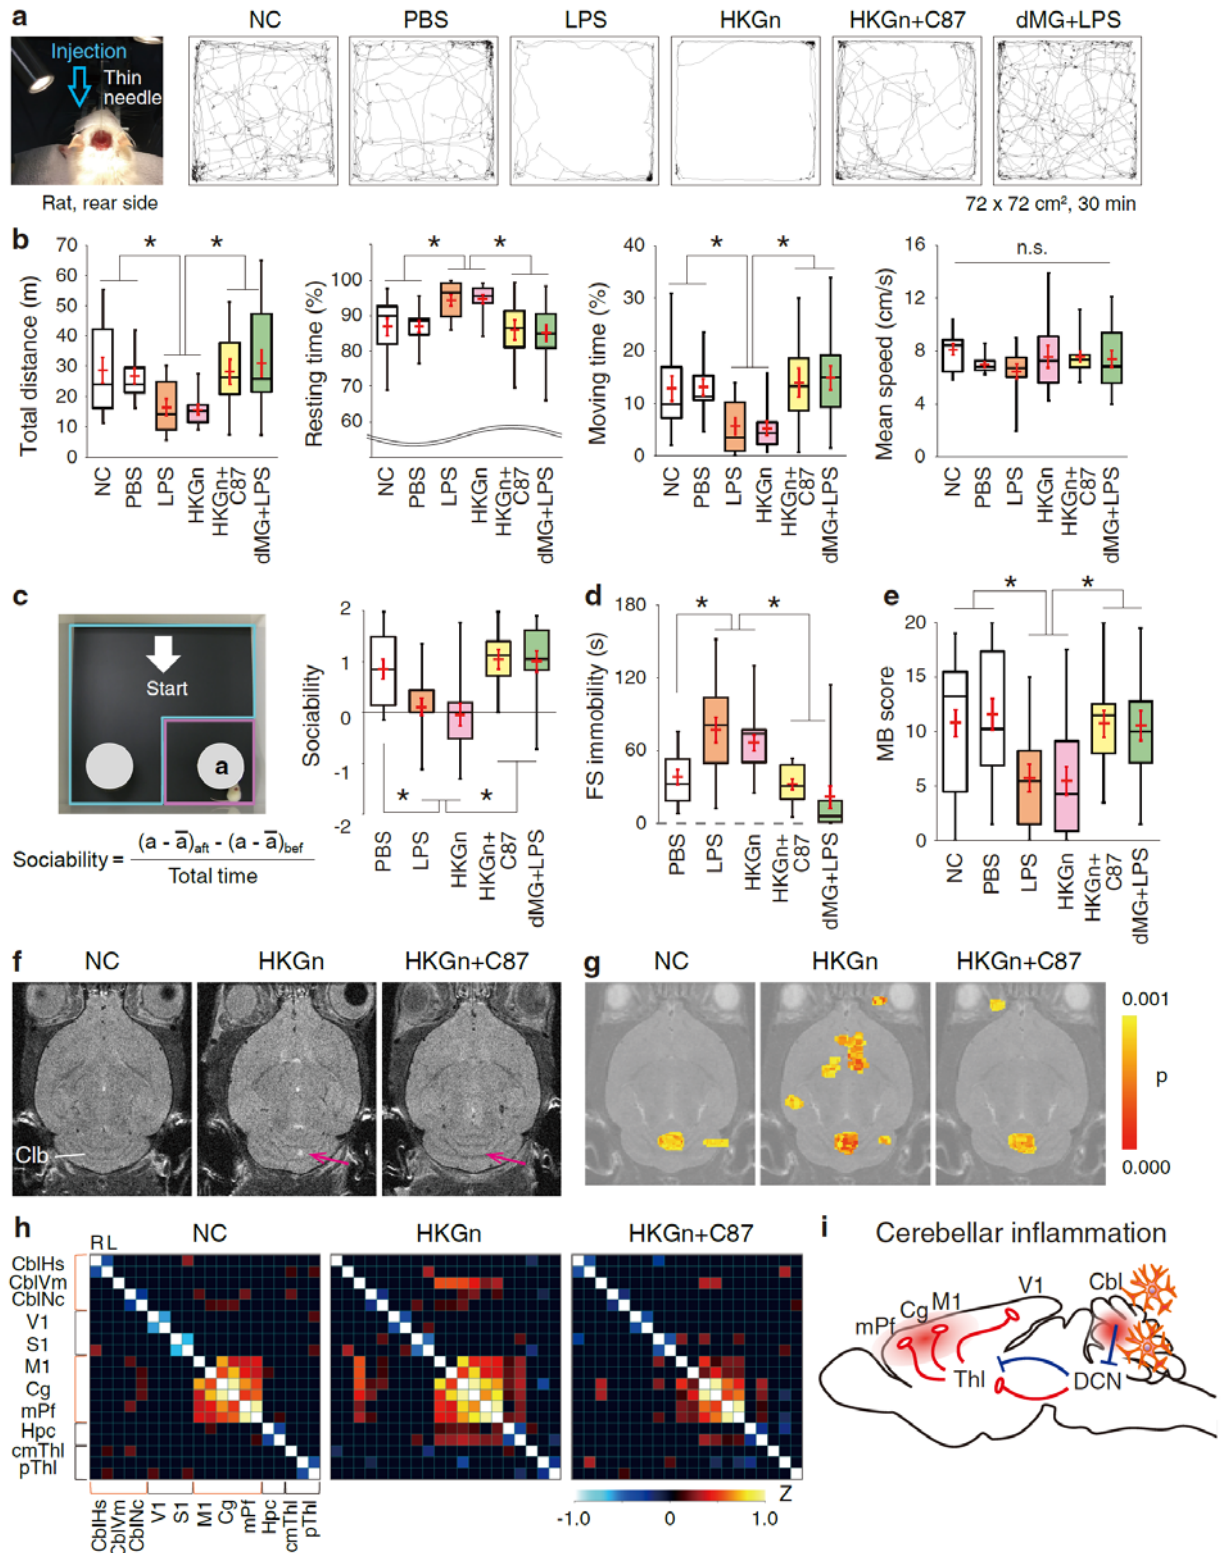

61

62 **Figure 5 | Induction and rescue of psychomotor depressiveness attributed from cerebello-**

63 **frontal functional overconnectivity. a, Representative trajectories of exploration behavior of drug-**

64 infused rats in the open field arena. PBS, LPS, heat-killed Gram-negative bacteria mixture (HKGn),  
65 HKGn+C87, LPS to microglia-depleted animals (dMG+LPS) or nothing (NC) was injected into the  
66 anterior cerebellar vermis. **b**, Box plots of the total distance, resting time, moving time, and mean  
67 speed. Overlapping red marks represent mean  $\pm$  SEM. Co-injection of TNF- $\alpha$  inhibitor C87 and  
68 MG-deletion significantly reduced the sluggishness of animals. **c**, Social interaction. **d**, Forced swim  
69 test. **e**, Marble burying score. \* $p < 0.05$ , *multiple comparison*. **f**, FLAIR magnetic resonance images  
70 indicate inflammation in HKGn, but not in HKGn+C87. Magenta arrows indicate the locations of  
71 injection. **g**, Resting-state functional magnetic resonance imaging (rs-fMRI) of control, HKGn- and  
72 HKGn+C87-infused rats. A seed was given in the anterior lobe of cerebellar vermis. Color-code  
73 indicates the functional connectivity obtained from BOLD signal. **h**, Seed-seed correlation maps  
74 shown with Z-score. Seeds were applied in the right and left hemispheres as marked by R and L,  
75 respectively, except for the anterior lobe of the cerebellar vermis (CbIVm) and centro-medial  
76 thalamus (cmThl). Please note that the correlation is enhanced in HKGn between CbIVm and  
77 M1+Cg+mPf (*i.e.*, primary motor cortex + cingulate cortex + medial prefrontal cortex).  
78 Abbreviations of brain regions are described in Methods. **i**, Schematic drawing of activated regions  
79 during the cerebellar inflammation.

80

81

|               | Base [mV]       | Peak [mV]      | Threshold [mV]    | Amplitude [mV]  | FWHM [ms]         | 10-90% rise [ $\mu$ s] | AHP [mV]        | $I_{inj}$ for AP [pA] | N  |
|---------------|-----------------|----------------|-------------------|-----------------|-------------------|------------------------|-----------------|-----------------------|----|
| Control       | -55.2 $\pm$ 1.6 | 22.1 $\pm$ 2.4 | -50.8 $\pm$ 2.1   | 77.3 $\pm$ 3.3  | 331.0 $\pm$ 9.4   | 214.2 $\pm$ 10.4       | -6.9 $\pm$ 0.7  | 270.8 $\pm$ 21.7      | 12 |
| LPS           | -59.2 $\pm$ 1.5 | 21.9 $\pm$ 3.3 | -55.7 $\pm$ 1.8   | 81.1 $\pm$ 2.7  | *276.1 $\pm$ 17.8 | *183.0 $\pm$ 8.8       | *-4.6 $\pm$ 0.6 | 262.5 $\pm$ 13.9      | 12 |
| PGN           | -55.5 $\pm$ 1.3 | 19.3 $\pm$ 1.5 | -51.0 $\pm$ 2.0   | 74.8 $\pm$ 2.3  | 300.5 $\pm$ 12.2  | 208.5 $\pm$ 10.1       | †-7.0 $\pm$ 0.8 | 276.9 $\pm$ 21.6      | 13 |
| TNF- $\alpha$ | -62.5 $\pm$ 1.3 | 22.5 $\pm$ 1.9 | *-58.8 $\pm$ 1.5  | *85.1 $\pm$ 2.6 | *262.4 $\pm$ 10.1 | *183.3 $\pm$ 8.7       | *-4.0 $\pm$ 0.4 | 257.7 $\pm$ 15.9      | 13 |
| HKEB          | -61.9 $\pm$ 1.0 | 21.3 $\pm$ 1.6 | *-57.6 $\pm$ 1.2  | 83.2 $\pm$ 2.2  | 311.5 $\pm$ 8.5   | 201.4 $\pm$ 6.9        | *-4.4 $\pm$ 0.6 | 250.0 $\pm$ 12.0      | 15 |
| HKPA          | -61.8 $\pm$ 0.7 | 21.8 $\pm$ 1.5 | *†-59.0 $\pm$ 0.5 | 83.6 $\pm$ 1.6  | *288.7 $\pm$ 6.6  | *184.8 $\pm$ 5.9       | *-4.2 $\pm$ 0.6 | 253.3 $\pm$ 15.0      | 15 |
| HKSP          | -58.3 $\pm$ 1.4 | 18.4 $\pm$ 1.8 | -55.3 $\pm$ 1.4   | 76.8 $\pm$ 1.8  | †353.8 $\pm$ 17.6 | †215.8 $\pm$ 8.9       | -5.3 $\pm$ 0.9  | 228.6 $\pm$ 12.5      | 14 |
| ATP           | -58.4 $\pm$ 1.4 | 17.2 $\pm$ 1.4 | -55.1 $\pm$ 1.5   | 75.6 $\pm$ 2.4  | †333.7 $\pm$ 11.0 | †225.1 $\pm$ 15.9      | -5.4 $\pm$ 0.4  | 227.5 $\pm$ 20.7      | 20 |

82

83 **Supplementary Table 1 | Action potential waveform parameters of rat Purkinje neurons in**  
84 **response to immune-related reagents.**

85 Recordings were obtained under current-clamp. Baseline voltage, action potential (AP) peak, AP  
86 threshold, AP amplitude to the peak, AP width as full width at half maximum (FWHM), 10–90% rise  
87 time, after hyperpolarization (AHP), and injected current are shown with the corresponding number  
88 of cells. APs were generated by a depolarization current administered at the soma. Data are shown as  
89 mean  $\pm$  SEM. p-values were obtained using two-sided Mann-Whitney *U*-test between control or LPS  
90 and other factors. Significant differences are marked with \* and †, respectively. ATP, adenosine  
91 triphosphate; HKEB, heat-killed *Escherichia coli*; HKPA, heat-killed *Pseudomonas aeruginosa*;  
92 HKSP, heat-killed *Streptococcus pneumoniae*; LPS, lipopolysaccharide; PGN, peptidoglycan; TNF-  
93  $\alpha$ , tumor necrosis factor alpha.

94

95

|                | Base [mV]    | Peak [mV]  | Threshold [mV] | Amplitude [mV] | FWHM [ms]    | 10-90% rise [ms] | AHP [mV]   | $I_{inj}$ for AP [pA] | N  |
|----------------|--------------|------------|----------------|----------------|--------------|------------------|------------|-----------------------|----|
| MG-depleted    | -57.5 ± 1.9  | 20.5 ± 1.4 | -53.1 ± 2.4    | 78.0 ± 2.5     | 271.3 ± 6.8  | 224.6 ± 9.9      | -7.0 ± 1.1 | 304.2 ± 45.4          | 12 |
| dMG + LPS      | -61.0 ± 1.8  | 22.6 ± 1.9 | -57.0 ± 2.1    | 83.6 ± 2.4     | 262.3 ± 5.2  | 195.2 ± 10.2     | -6.9 ± 0.7 | 236.7 ± 27.8          | 15 |
| dMG + HKGn     | -57.8 ± 1.2  | 21.3 ± 1.7 | -52.9 ± 1.7    | 79.0 ± 2.6     | 280.2 ± 9.6  | 232.7 ± 17.4     | -7.4 ± 0.7 | 258.8 ± 25.8          | 17 |
| TLR2 KO        | -58.2 ± 1.8  | 14.4 ± 2.4 | -53.6 ± 2.5    | 72.6 ± 3.3     | 261.5 ± 15.8 | 238.8 ± 24.1     | -7.4 ± 0.9 | 238.9 ± 43.9          | 9  |
| TLR2 KO + LPS  | *-64.3 ± 1.0 | 17.3 ± 2.2 | *-60.7 ± 0.9   | *81.6 ± 2.7    | 277.8 ± 10.3 | 189.5 ± 7.1      | -5.5 ± 0.4 | 191.7 ± 5.6           | 12 |
| TLR4 KO        | -55.7 ± 2.1  | 14.1 ± 2.1 | -49.4 ± 2.7    | 69.8 ± 2.4     | 291.5 ± 11.5 | 223.6 ± 20.0     | -7.9 ± 0.9 | 278.6 ± 1.5           | 14 |
| TLR4 KO + LPS  | -56.8 ± 1.8  | 13.0 ± 2.0 | -51.7 ± 2.4    | 69.8 ± 3.1     | 289.1 ± 12.2 | 236.8 ± 21.0     | -7.2 ± 0.9 | 250.0 ± 24.4          | 15 |
| TLR4 KO + HKGn | -60.9 ± 1.6  | 8.7 ± 1.7  | -56.9 ± 2.1    | 69.6 ± 2.5     | 316.7 ± 11.0 | 218.1 ± 11.3     | -6.1 ± 0.7 | 220.0 ± 17.5          | 15 |
| MyD88 KO       | -59.4 ± 1.7  | 16.9 ± 1.5 | -53.9 ± 2.4    | 76.4 ± 2.4     | 240.7 ± 9.0  | 192.6 ± 11.7     | -7.1 ± 0.5 | 281.8 ± 23.6          | 12 |
| MyD88 KO + LPS | -61.4 ± 2.2  | 17.9 ± 2.8 | -56.0 ± 2.4    | 79.4 ± 4.4     | 254.9 ± 9.0  | 198.3 ± 12.6     | -6.8 ± 0.7 | 277.3 ± 23.7          | 11 |
| TRIF KO        | -59.4 ± 1.3  | 21.4 ± 1.7 | -54.5 ± 2.0    | 80.8 ± 1.8     | 265.8 ± 9.2  | 188.0 ± 9.1      | -6.5 ± 0.7 | 253.3 ± 19.2          | 15 |
| TRIF KO + LPS  | -59.9 ± 1.4  | 20.3 ± 1.5 | -54.6 ± 1.9    | 80.2 ± 1.9     | 264.8 ± 8.2  | 200.6 ± 9.2      | -6.4 ± 0.8 | 276.5 ± 20.2          | 17 |

96

97 **Supplementary Table 2 | Action potential properties of microglia-depleted and immune-related**  
98 **molecule-deficient mouse Purkinje neurons.**

99 Recordings were obtained under current-clamp. Baseline voltage, action potential (AP) peak, AP  
100 threshold, AP amplitude to the peak, AP width as full width at half maximum (FWHM), 10–90% rise  
101 time, after hyperpolarization (AHP), and injected current are shown with the corresponding number  
102 of cells. APs were generated by a depolarization current administered at the soma. Data are shown as  
103 mean ± SEM. p-values were obtained using two-sided Mann-Whitney *U*-test between control or LPS  
104 and other factors. Significant differences compared among each group are marked with \*. MG-  
105 depleted, microglia-depleted (dMG); HKGn, heat-killed Gram-negative bacteria mixture; LPS,  
106 lipopolysaccharide; MyD88 KO, Myeloid differentiation primary response gene 88 knockout mice;  
107 TLR2/4 KO, Toll-like receptor 2/4 knockout mice; TRIF KO, TIR-domain-containing adapter-  
108 inducing interferon-β knockout mice.

109

110



**Supplementary Table 3 - 1** | Summary of the statistics.

| Figure number                     | Statistic method                                 | The number of data                                                              | Statistic results                                                                                                                                                                                                                                                                                                                          | Statistic values                                                           |
|-----------------------------------|--------------------------------------------------|---------------------------------------------------------------------------------|--------------------------------------------------------------------------------------------------------------------------------------------------------------------------------------------------------------------------------------------------------------------------------------------------------------------------------------------|----------------------------------------------------------------------------|
| 1b<br>LPS vs Control              | Two-tailed<br>Mann-Whitney<br><i>U</i> -test     | Control, n = 14<br>LPS, n = 12<br>{50, 100, ... , 550 pA}                       | p = {0.1331 0.0500 0.0188<br>0.0152 0.0167 0.0179 0.0179<br>0.0117 0.0059 0.0039 0.0052}                                                                                                                                                                                                                                                   | U = {70.0 48.5 38.5<br>36.5 37.0 37.5 37.5<br>34.5 30.0 27.5 25.5}         |
| 1d<br>LPS vs Control              | Two-tailed<br>Mann-Whitney<br><i>U</i> -test     | Control, n = 8<br>LPS, n = 8                                                    | p = 0.00062                                                                                                                                                                                                                                                                                                                                | U = 2                                                                      |
| 1e<br>HKEB vs Control             | Two-tailed<br>Mann-Whitney<br><i>U</i> -test     | HKEB, n = 15<br>{50, 100, ... , 550 pA}                                         | p = {0.0453 0.0015 0.0040<br>0.0066 0.0077 0.0144 0.0230<br>0.0323 0.0072 0.0015 0.0008}                                                                                                                                                                                                                                                   | U = {62.0 20.0 24.0<br>27.5 28.5 33.5 37.5<br>40.5 28.0 17.0 13.0}         |
| 1e<br>HKPA vs Control             | Two-tailed<br>Mann-Whitney<br><i>U</i> -test     | HKPA, n = 15<br>{50, 100, ... , 550 pA}                                         | p = {0.0048 0.0024 0.0019<br>0.0031 0.0045 0.0055 0.0063<br>0.0059 0.0012 0.0003 0.0004}                                                                                                                                                                                                                                                   | U = {41.0 24.0 19.0<br>22.0 24.5 26.0 27.0<br>26.5 15.5 6.5 8.0}           |
| 1e<br>HKSP vs Control             | Two-tailed<br>Mann-Whitney<br><i>U</i> -test     | HKSP, n = 14<br>{50, 100, ... , 550 pA}                                         | p = {NaN 0.1255 0.1171<br>0.0718 0.0687 0.1024 0.3456<br>0.6287 0.4616 0.2691 0.1677}                                                                                                                                                                                                                                                      | U = {98.0 67.0 64.0<br>58.5 58.0 62.0 77.0<br>87.0 81.5 73.5 67.5}         |
| 1g<br>HKEB vs Control             | Two-tailed<br>Mann-Whitney<br><i>U</i> -test     | HKEB, n = 6                                                                     | p = 0.0080                                                                                                                                                                                                                                                                                                                                 | U = 4                                                                      |
| 1g<br>HKPA vs Control             | Two-tailed<br>Mann-Whitney<br><i>U</i> -test     | HKPA, n = 6                                                                     | p = 0.0127                                                                                                                                                                                                                                                                                                                                 | U = 5                                                                      |
| 1g<br>HKSP vs Control             | Two-tailed<br>Mann-Whitney<br><i>U</i> -test     | HKSP, n = 7                                                                     | p = 0.1419                                                                                                                                                                                                                                                                                                                                 | U = 12                                                                     |
| 1i<br>LPS vs Control              | Two-tailed<br>Mann-Whitney<br><i>U</i> -test     | Control, n = 28<br>LPS, n = 5                                                   | p = 0.0328                                                                                                                                                                                                                                                                                                                                 | U = 113                                                                    |
| 1i<br>Apamin vs<br>Control        | Two-tailed<br>Mann-Whitney<br><i>U</i> -test     | Control, n = 28<br>Apamin, n = 9                                                | p = 0.0014                                                                                                                                                                                                                                                                                                                                 | U = 217                                                                    |
| 1k                                | Kruskal-Wallis test<br>with Bonferroni<br>method | Control, n = 54<br>100µg/ml, n = 48<br>250µg/ml, n = 44<br>20mg/ml o.a., n = 43 | p = 0, for Kruskal-Wallis test<br>p = 4.7*10 <sup>-10</sup> , for Ctrl vs 100µg/ml<br>p = 8.4*10 <sup>-11</sup> , for Ctrl vs 250µg/ml<br>p = 6.1*10 <sup>-35</sup> , for Ctrl vs 20mg/ml<br>p = 1.0, for 100µg/ml vs 250µg/ml<br>p = 1.2*10 <sup>-8</sup> , for 100µg/ml vs 20mg/ml<br>p = 2.4*10 <sup>-7</sup> , for 250µg/ml vs 20mg/ml | Kruskal-Wallis statistics<br>= 157.66                                      |
| 1l<br>dMG vs Control              | Two-tailed<br>Mann-Whitney<br><i>U</i> -test     | dMG, n = 12<br>{50, 100, ... , 550 pA}                                          | p = {0.1331 0.3962 0.9777<br>0.5881 0.4005 0.5691 0.8368<br>0.8772 0.9590 0.5198 0.2363}                                                                                                                                                                                                                                                   | U = {97.0 96.5 83.0<br>73.5 67.5 72.5 79.5<br>80.5 85.5 97.0 87.5}         |
| 1l<br>dMG+LPS vs<br>Control       | Two-tailed<br>Mann-Whitney<br><i>U</i> -test     | dMG+LPS, n = 14<br>{50, 100, ... , 550 pA}                                      | p = {0.0684 0.3133 0.1784<br>0.3375 0.4077 0.5927 0.5595<br>0.4515 0.2853 0.1519 0.0847}                                                                                                                                                                                                                                                   | U = {84.0 86.5 77.5<br>85.0 87.5 93.5 92.5<br>89.0 82.5 75.0 69.0}         |
| 1l<br>dMG+HKGn vs<br>Control      | Two-tailed<br>Mann-Whitney<br><i>U</i> -test     | dMG+HKGn, n = 17<br>{50, 100, ... , 550 pA}                                     | p = {NaN 0.5342 0.7944<br>0.7917 0.8260 0.9524 0.8580<br>0.7356 0.3819 0.1470 0.0619}                                                                                                                                                                                                                                                      | U = {119.0 105.5 125.5<br>126.0 125.0 121.0 114.0<br>110.0 96.5 82.0 71.5} |
| 1n<br>dMG+5Hz-depolariza-<br>tion | Wilcoxon<br>signed-rank test                     | dMG+5Hz-depol.,<br>n = 6                                                        | p = 0.0313                                                                                                                                                                                                                                                                                                                                 | signed-rank test statistics<br>= 0                                         |
| 1n<br>dMG+LPS                     | Wilcoxon<br>signed-rank test                     | dMG+LPS, n = 8                                                                  | p = 0.0234, for reduction                                                                                                                                                                                                                                                                                                                  | signed-rank test statistics<br>= 2                                         |
| 1n<br>dMG+HKGn                    | Wilcoxon<br>signed-rank test                     | dMG+HKGn, n = 6                                                                 | p = 0.9375                                                                                                                                                                                                                                                                                                                                 | signed-rank test statistics<br>= 10                                        |

111

112

Supplementary Table 3 - 2

| Figure number                              | Statistic method                             | The number of data                                                       | Statistic results                                                                        | Statistic values                                                                                                                                 |
|--------------------------------------------|----------------------------------------------|--------------------------------------------------------------------------|------------------------------------------------------------------------------------------|--------------------------------------------------------------------------------------------------------------------------------------------------|
| 2a<br>TNF $\alpha$ vs Control              | Two-tailed<br>Mann-Whitney<br><i>U</i> -test | TNF $\alpha$ , n = 13<br>{50, 100, ..., 550 pA}                          | p = {0.0023 0.0051 0.0215<br>0.0114 0.0132 0.0198 0.0255<br>0.0211 0.0076 0.0017 0.0012} | U = {42.0 37.0 44.0<br>38.5 39.5 42.5 44.5<br>43.0 35.5 26.0 24.0}                                                                               |
| 2a<br>PGN vs Control                       | Two-tailed<br>Mann-Whitney<br><i>U</i> -test | PGN, n = 13<br>{50, 100, ..., 550 pA}                                    | p = {NaN 0.6170 0.2318<br>0.2499 0.2337 0.2852 0.3687<br>0.3190 0.2964 0.3435 0.3313}    | U = {91.0 83.0 80.5<br>81.0 80.0 82.5 86.0<br>84.0 83.0 85.0 84.5}                                                                               |
| 2b<br>PGN vs Control                       | Two-tailed<br>Mann-Whitney<br><i>U</i> -test | PGN, n = 6                                                               | p = 0.2284                                                                               | U = 49                                                                                                                                           |
| 2c<br>LPS+C87 vs<br>Control                | Two-tailed<br>Mann-Whitney<br><i>U</i> -test | LPS+C87, n = 6                                                           | p = 0.7546                                                                               | U = 42                                                                                                                                           |
| 2c<br>HKGn+C87 vs<br>Control               | Two-tailed<br>Mann-Whitney<br><i>U</i> -test | HKGn+C87, n = 8                                                          | p = 1                                                                                    | U = 39                                                                                                                                           |
| 2d<br>TNF $\alpha$ vs Control              | Two-tailed<br>Mann-Whitney<br><i>U</i> -test | TNF $\alpha$ , n = 7                                                     | p = 0.0289                                                                               | U = 9                                                                                                                                            |
| 2d<br>LPS aft. TNF $\alpha$<br>vs Control  | Two-tailed<br>Mann-Whitney<br><i>U</i> -test | LPS aft. TNF $\alpha$ , n = 6                                            | p = 0.4136                                                                               | U = 46                                                                                                                                           |
| 2e<br>TNF $\alpha$ under OKA<br>vs Control | Two-tailed<br>Mann-Whitney<br><i>U</i> -test | TNF $\alpha$ under OKA, n = 5                                            | p = 0.4351                                                                               | U = 47                                                                                                                                           |
| 2g<br>TNF fold change<br>vs 0 min baseline | Two-tailed<br>Mann-Whitney<br><i>U</i> -test | n = 4                                                                    | p = 0.0286, at 20 min<br>p = 0.0286, at 60 min                                           | U = 0<br>U = 0                                                                                                                                   |
| 2i<br>$\Delta$ ATP                         | Wilcoxon<br>signed-rank test                 | ML, LPS, n = 16<br>ML, HKGn, n = 8<br>GL, LPS, n = 22<br>GL, HKGn, n = 5 | p = 0.0174<br>p = 0.0391<br>p = 0.8076<br>p = 0.0625                                     | signed-rank test statistics = 22<br>signed-rank test statistics = 3<br>signed-rank test statistics = 119<br>signed-rank test statistics = 0      |
| 2k<br>$\Delta$ ATP                         | Wilcoxon<br>signed-rank test                 | ML, LPS, n = 8<br>ML, HKGn, n = 7<br>GL, LPS, n = 21<br>GL, HKGn, n = 19 | p = 0.9453<br>p = 0.6875<br>p = 0.1642<br>p = 0.2048                                     | signed-rank test statistics = 17<br>signed-rank test statistics = 11<br>signed-rank test statistics = 75.5<br>signed-rank test statistics = 63.5 |
| 2l<br>ATP vs Control                       | Two-tailed<br>Mann-Whitney<br><i>U</i> -test | ATP, n = 7                                                               | p = 0.1206                                                                               | U = 50                                                                                                                                           |
| 2n<br>ATP vs Control                       | Two-tailed<br>Mann-Whitney<br><i>U</i> -test | ATP, n = 20<br>{50, 100, ..., 550 pA}                                    | p = {0.4372 0.1637 0.1795<br>0.1925 0.3169 0.6486 0.7928<br>0.7000 0.5633 0.3444 0.2624} | U = {133.0 104.0 102.0<br>102.5 111.0 126.5 132.0<br>128.5 123.0 112.5 107.5}                                                                    |
| 2n<br>ATP vs LPS                           | Two-tailed<br>Mann-Whitney<br><i>U</i> -test | ATP, n = 20<br>{50, 100, ..., 550 pA}                                    | p = {0.2645 0.2301 0.3483<br>0.0976 0.0468 0.0166 0.0166<br>0.0166 0.0149 0.0142 0.0218} | U = {125.0 110.0 115.5<br>97.0 88.5 78.0 78.0<br>78.0 77.0 76.5 74.0}                                                                            |
| 2o<br>LPS with PPADS<br>vs Control         | Two-tailed<br>Mann-Whitney<br><i>U</i> -test | LPS with PPADS, n = 6                                                    | p = 0.0426                                                                               | U = 8                                                                                                                                            |

113

114

Supplementary Table 3 - 3

| Figure number                            | Statistic method                                      | The number of data                                                                                                                                  | Statistic results                                                                                                                                                                                                                                                                                                                                                                                                                                                                                                                                                    | Statistic values                                                                                |
|------------------------------------------|-------------------------------------------------------|-----------------------------------------------------------------------------------------------------------------------------------------------------|----------------------------------------------------------------------------------------------------------------------------------------------------------------------------------------------------------------------------------------------------------------------------------------------------------------------------------------------------------------------------------------------------------------------------------------------------------------------------------------------------------------------------------------------------------------------|-------------------------------------------------------------------------------------------------|
| 3c<br>sEPSC Amplitude<br>Each vs Control | Two-tailed<br>Mann-Whitney<br><i>U</i> -test          | LPS, n = 13<br>PGN, n = 12<br>TNFa, n = 15<br>HKEB, n = 16<br>HKPA, n = 13<br>HKSP, n = 16<br>Mino.+LPS, n = 14<br>ATP, n = 15<br>PPADS+LPS, n = 18 | p = 0.7165<br>p = 0.9475<br>p = 0.1127<br>p = 0.4247<br>p = 0.6612<br>p = 0.1341<br>p = 0.2880<br>p = 0.1538<br>p = 0.0230, for reduction                                                                                                                                                                                                                                                                                                                                                                                                                            | U = 193<br>U = 189<br>U = 170<br>U = 219<br>U = 190<br>U = 187<br>U = 179<br>U = 177<br>U = 175 |
| 3e<br>sEPSC Frequency<br>Each vs Control | Two-tailed<br>Mann-Whitney<br><i>U</i> -test          | LPS, n = 13<br>PGN, n = 12<br>TNFa, n = 15<br>HKEB, n = 16<br>HKPA, n = 13<br>HKSP, n = 16<br>Mino.+LPS, n = 14<br>ATP, n = 15<br>PPADS+LPS, n = 18 | p = 0.0323<br>p = 0.0438<br>p = 0.0023<br>p = 0.0409<br>p = 0.0012<br>p = 0.5475<br>p = 0.8767<br>p = 0.0411<br>p = 0.0995                                                                                                                                                                                                                                                                                                                                                                                                                                           | U = 122<br>U = 115<br>U = 106<br>U = 162<br>U = 78<br>U = 228<br>U = 217<br>U = 150<br>U = 206  |
| 4a<br>LPS under apocynin<br>vs Control   | Two-tailed<br>Mann-Whitney<br><i>U</i> -test          | LPS under apocynin,<br>n = 8                                                                                                                        | p = 0.0281                                                                                                                                                                                                                                                                                                                                                                                                                                                                                                                                                           | U = 11                                                                                          |
| 4b<br>LPS with C34<br>vs Control         | Two-tailed<br>Mann-Whitney<br><i>U</i> -test          | LPS with C34, n = 7                                                                                                                                 | p = 0.1206                                                                                                                                                                                                                                                                                                                                                                                                                                                                                                                                                           | U = 50                                                                                          |
| 4c, 4d<br>LPS / HKGn<br>to TLR4KO        | Wilcoxon<br>signed-rank test                          | LPS, n = 9<br>HKGn, n = 7                                                                                                                           | p = 0.9494<br>p = 0.1094                                                                                                                                                                                                                                                                                                                                                                                                                                                                                                                                             | signed-rank test statistics = 22<br>signed-rank test statistics = 4                             |
| 4e<br>LPS to TLR2KO                      | Wilcoxon<br>signed-rank test                          | LPS, n = 7                                                                                                                                          | p = 0.0156                                                                                                                                                                                                                                                                                                                                                                                                                                                                                                                                                           | signed-rank test statistics = 0                                                                 |
| 4f<br>LPS to MyD88KO                     | Wilcoxon<br>signed-rank test                          | LPS, n = 6                                                                                                                                          | p = 1                                                                                                                                                                                                                                                                                                                                                                                                                                                                                                                                                                | signed-rank test statistics = 10                                                                |
| 4g<br>LPS to TRIFKO                      | Wilcoxon<br>signed-rank test                          | LPS, n = 7                                                                                                                                          | p = 0.8125                                                                                                                                                                                                                                                                                                                                                                                                                                                                                                                                                           | signed-rank test statistics = 12                                                                |
| 5b<br>Total distance                     | Kruskal-Wallis test<br>with Fisher's LSD<br>procedure | NC, n = 13<br>PBS, n = 11<br>LPS, n = 11<br>HKGn, n = 11<br>HKGn+C87, n = 12<br>dMG+LPS, n = 16                                                     | p = 0.0205, for Kruskal-Wallis test;<br>p = 0.9266, for NC vs PBS;<br>p = 0.0431, for NC vs LPS;<br>p = 0.0232, for NC vs HKGn;<br>p = 0.9656, for NC vs HKGn+C87;<br>p = 0.7816, for NC vs dMG+LPS;<br>p = 0.0421, for PBS vs LPS;<br>p = 0.0232, for PBS vs HKGn;<br>p = 0.9610, for PBS vs HKGn+C87;<br>p = 0.8666, for PBS vs dMG+LPS;<br>p = 0.8119, for LPS vs HKGn;<br>p = 0.0427, for LPS vs HKGn+C87;<br>p = 0.0173, for LPS vs dMG+LPS;<br>p = 0.0232, for HKGn vs HKGn+C87;<br>p = 0.0083, for HKGn vs dMG+LPS;<br>p = 0.8214,<br>for dMG+LPS vs HKGn+C87 | Kruskal-Wallis<br>statistics = 13.33                                                            |

115

116

Supplementary Table 3 - 4

| Figure number      | Statistic method                                      | The number of data                                                                              | Statistic results                                                                                                                                                                                                                                                                                                                                                                                                                                                                                                                                     | Statistic values                     |
|--------------------|-------------------------------------------------------|-------------------------------------------------------------------------------------------------|-------------------------------------------------------------------------------------------------------------------------------------------------------------------------------------------------------------------------------------------------------------------------------------------------------------------------------------------------------------------------------------------------------------------------------------------------------------------------------------------------------------------------------------------------------|--------------------------------------|
| 5b<br>Resting time | Kruskal-Wallis test<br>with Fisher's LSD<br>procedure | NC, n = 13<br>PBS, n = 11<br>LPS, n = 11<br>HKGn, n = 11<br>HKGn+C87, n = 12<br>dMG+LPS, n = 16 | p = 0.0023, for Kruskal-Wallis test<br>p = 0.6656, for NC vs PBS<br>p = 0.0234, for NC vs LPS<br>p = 0.0164, for NC vs HKGn<br>p = 0.8299, for NC vs HKGn+C87<br>p = 0.5442, for NC vs dMG+LPS<br>p = 0.0095, for PBS vs LPS<br>p = 0.0065, for PBS vs HKGn<br>p = 0.8273, for PBS vs HKGn+C87<br>p = 0.8996, for PBS vs dMG+LPS<br>p = 0.8975, for LPS vs HKGn<br>p = 0.0151, for LPS vs HKGn+C87<br>p = 0.0032, for LPS vs dMG+LPS<br>p = 0.0104, for HKGn vs HKGn+C87<br>p = 0.0020, for HKGn vs dMG+LPS<br>p = 0.7130,<br>for dMG+LPS vs HKGn+C87 | Kruskal-Wallis<br>statistics = 18.56 |
| 5b<br>Moving time  | Kruskal-Wallis test<br>with Fisher's LSD<br>procedure | NC, n = 13<br>PBS, n = 11<br>LPS, n = 11<br>HKGn, n = 11<br>HKGn+C87, n = 12<br>dMG+LPS, n = 16 | p = 0.0024, for Kruskal-Wallis test<br>p = 0.6367, for NC vs PBS<br>p = 0.0257, for NC vs LPS<br>p = 0.0190, for NC vs HKGn<br>p = 0.8134, for NC vs HKGn+C87<br>p = 0.5040, for NC vs dMG+LPS<br>p = 0.0094, for PBS vs LPS<br>p = 0.0068, for PBS vs HKGn<br>p = 0.8126, for PBS vs HKGn+C87<br>p = 0.8863, for PBS vs dMG+LPS<br>p = 0.9132, for LPS vs HKGn<br>p = 0.0157, for LPS vs HKGn+C87<br>p = 0.0030, for LPS vs dMG+LPS<br>p = 0.0115, for HKGn vs HKGn+C87<br>p = 0.0020, for HKGn vs dMG+LPS<br>p = 0.6848,<br>for dMG+LPS vs HKGn+C87 | Kruskal-Wallis<br>statistics = 18.44 |
| 5b<br>Mean speed   | Kruskal-Wallis test<br>with Fisher's LSD<br>procedure | NC, n = 13<br>PBS, n = 11<br>LPS, n = 11<br>HKGn, n = 11<br>HKGn+C87, n = 12<br>dMG+LPS, n = 16 | p = 0.4374, for Kruskal-Wallis test<br>p = 0.1145, for NC vs PBS<br>p = 0.0590, for NC vs LPS<br>p = 0.2355, for NC vs HKGn<br>p = 0.5631, for NC vs HKGn+C87<br>p = 0.1724, for NC vs dMG+LPS<br>p = 0.7661, for PBS vs LPS<br>p = 0.7064, for PBS vs HKGn<br>p = 0.3199, for PBS vs HKGn+C87<br>p = 0.7262, for PBS vs dMG+LPS<br>p = 0.5002, for LPS vs HKGn<br>p = 0.1941, for LPS vs HKGn+C87<br>p = 0.5004, for LPS vs dMG+LPS<br>p = 0.5420, for HKGn vs HKGn+C87<br>p = 0.9521, for HKGn vs dMG+LPS<br>p = 0.4665,<br>for dMG+LPS vs HKGn+C87 | Kruskal-Wallis<br>statistics = 4.83  |

117

118

Supplementary Table 3 - 5

| Figure number       | Statistic method                                | The number of data                                                                              | Statistic results                                                                                                                                                                                                                                                                                                                                                                                                                                                                                                                                        | Statistic values                  |
|---------------------|-------------------------------------------------|-------------------------------------------------------------------------------------------------|----------------------------------------------------------------------------------------------------------------------------------------------------------------------------------------------------------------------------------------------------------------------------------------------------------------------------------------------------------------------------------------------------------------------------------------------------------------------------------------------------------------------------------------------------------|-----------------------------------|
| 5c<br>Sociability   | Kruskal-Wallis test with Fisher's LSD procedure | PBS, n = 15<br>LPS, n = 15<br>HKGn, n = 12<br>HKGn+C87, n = 13<br>dMG+LPS, n = 16               | p = 0.0002, for Kruskal-Wallis test<br>p = 0.0304, for PBS vs LPS<br>p = 0.0108, for PBS vs HKGn<br>p = 0.4747, for PBS vs HKGn+C87<br>p = 0.5029, for PBS vs dMG+LPS<br>p = 0.6113, for LPS vs HKGn<br>p = 0.0051, for LPS vs HKGn+C87<br>p = 0.0041, for LPS vs dMG+LPS<br>p = 0.0017, for HKGn vs HKGn+C87<br>p = 0.0013, for HKGn vs dMG+LPS<br>p = 0.9357,<br>for dMG+LPS vs HKGn+C87                                                                                                                                                               | Kruskal-Wallis statistics = 6.57  |
| 5d<br>FS immobility | Kruskal-Wallis test with Fisher's LSD procedure | PBS, n = 15<br>LPS, n = 15<br>HKGn, n = 16<br>HKGn+C87, n = 14<br>dMG+LPS, n = 16               | p = 2.7*10 <sup>-6</sup> for Kruskal-Wallis test<br>p = 0.0069, for PBS vs LPS<br>p = 0.0163, for PBS vs HKGn<br>p = 0.7338, for PBS vs HKGn+C87<br>p = 0.0528, for PBS vs dMG+LPS<br>p = 0.7305, for LPS vs HKGn<br>p = 0.0027, for LPS vs HKGn+C87<br>p = 2.8*10 <sup>-6</sup> , for LPS vs dMG+LPS<br>p = 0.0068, for HKGn vs HKGn+C87<br>p = 1.0*10 <sup>-5</sup> , for HKGn vs dMG+LPS<br>p = 0.1195,<br>for dMG+LPS vs HKGn+C87                                                                                                                    | Kruskal-Wallis statistics = 31.27 |
| 5e<br>MB score      | Kruskal-Wallis test with Fisher's LSD procedure | NC, n = 24<br>PBS, n = 16<br>LPS, n = 15<br>HKGn, n = 16<br>HKGn+C87, n = 13<br>dMG+LPS, n = 14 | p = 0.0035, for Kruskal-Wallis test<br>p = 0.7146, for NC vs PBS<br>p = 0.0097, for NC vs LPS<br>p = 0.0050, for NC vs HKGn<br>p = 0.9570, for NC vs HKGn+C87<br>p = 0.9372, for NC vs dMG+LPS<br>p = 0.0070, for PBS vs LPS<br>p = 0.0038, for PBS vs HKGn<br>p = 0.7899, for PBS vs HKGn+C87<br>p = 0.6929, for PBS vs dMG+LPS<br>p = 0.8798, for LPS vs HKGn<br>p = 0.0217, for LPS vs HKGn+C87<br>p = 0.0264, for LPS vs dMG+LPS<br>p = 0.0133, for HKGn vs HKGn+C87<br>p = 0.0163,<br>for HKGn vs dMG+LPS<br>p = 0.9069,<br>for dMG+LPS vs HKGn+C87 | Kruskal-Wallis statistics = 17.6  |

119

120 **Supplementary Table 3 | Summary of the statistics.**

121 The statistical methods, numbers of data, statistic results, and statistic values in each figure are  
122 tabulated (1-5).

123

124

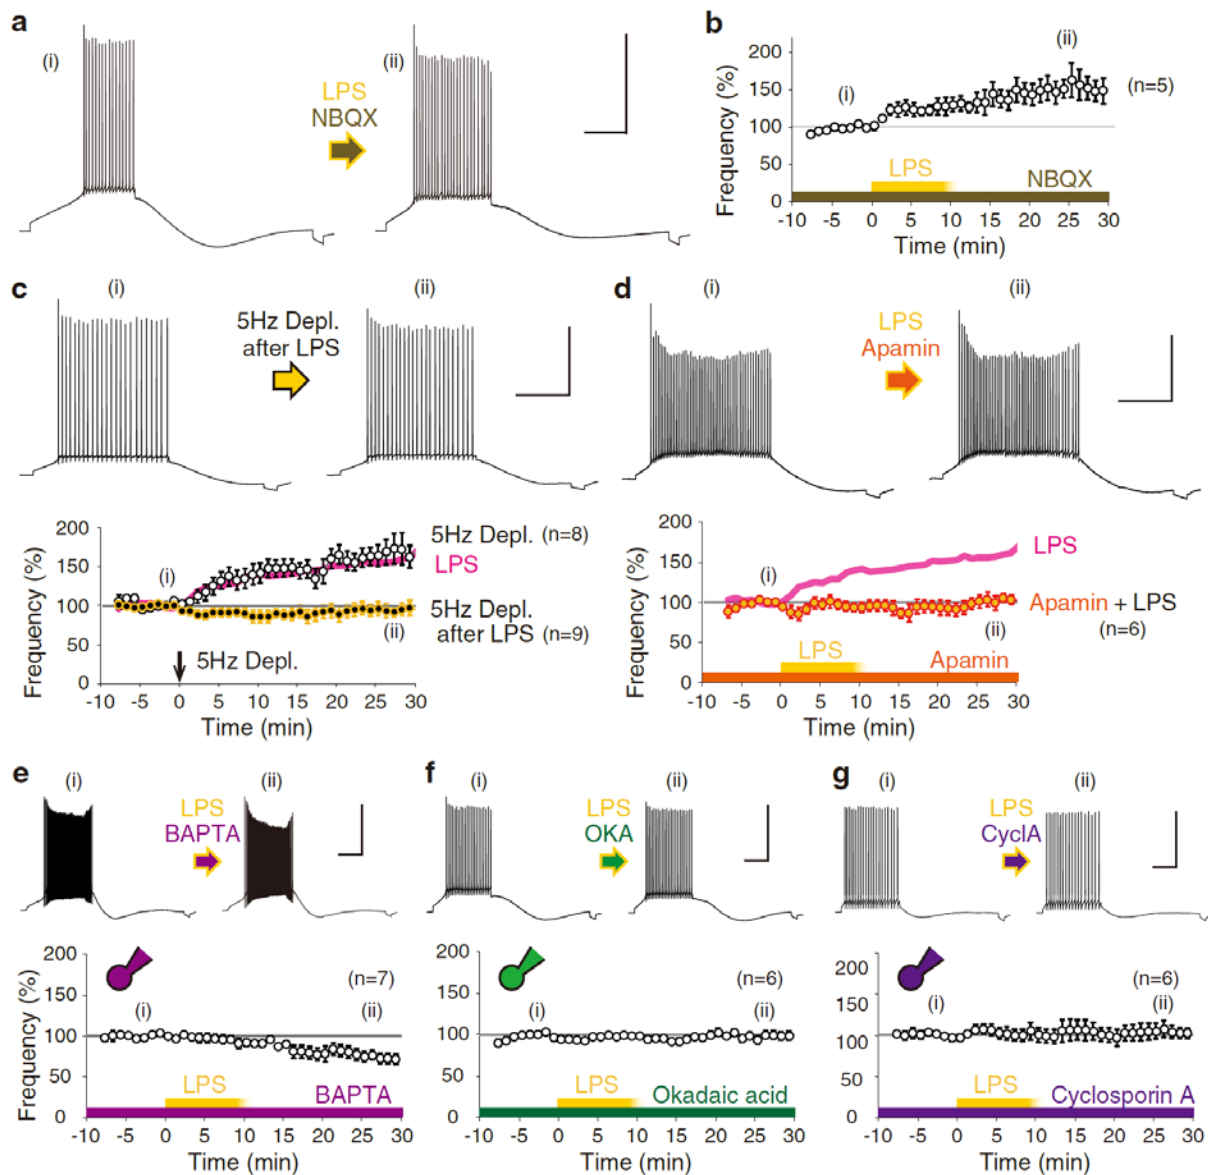

125

126 **Supplementary Figure 1 | Signaling involved in LPS-induced intrinsic plasticity in Purkinje**

127 **neurons. a**, Representative action potential firing of Purkinje neurons before and after LPS

128 (lipopolysaccharide, 10-12  $\mu\text{g}/\text{mL}$ ) treatment in the presence of an AMPA ( $\alpha$ -amino-3-hydroxy-5-

129 methyl-4-isoxazolepropionic acid) receptor blocker, NBQX (20  $\mu\text{M}$ ) (\* $p < 0.03$ , Mann-Whitney  $U$ -

130 test). **b**, Time course of the change in firing frequency normalized between -5 to -1 min. LPS

131 application began at 0 min and continued for 10 min. **c**, Occlusion of the increase in firing plasticity

132 in Purkinje neurons pre-exposed to LPS. Time courses of the normalized frequency of neurons

133 following 5-Hz depolarization and that after 15-minutes LPS exposure. Conditioning was applied at

134 0 min, as indicated by the arrowhead. LPS-only data are superimposed for comparison (magenta  
135 line) (5Hz Depl.+LPS,  $p > 0.8$ ; 5Hz Depl.,  $*p < 0.005$ ). **d**, Suppression of LPS-induced increases in  
136 firing frequency under treatment with the SK channel blocker, apamin (10 nM). A time course of the  
137 normalized frequency of neurons treated with LPS in the presence of apamin is shown. LPS  
138 application began at 0 min. **e-g**, Intra-neuronal administration of BAPTA (20 mM, e), okadaic acid  
139 (OKA, 150 nM, f) and cyclosporin A (CycloA, 100  $\mu$ M, g) inhibited increases in firing frequency by  
140 LPS exposure (BAPTA,  $\dagger p < 0.01$  for reduction; OKA,  $p > 0.4$ ; CycloA,  $p > 0.5$ ). Results suggest  
141 that LPS-induced increases in firing frequency were dependent on  $Ca^{2+}$ , PP1, PP2A, and PP2B. Drug  
142 application began at 0 min. Scale: 40 mV and 200 ms. LPS, lipopolysaccharide.  
143  
144

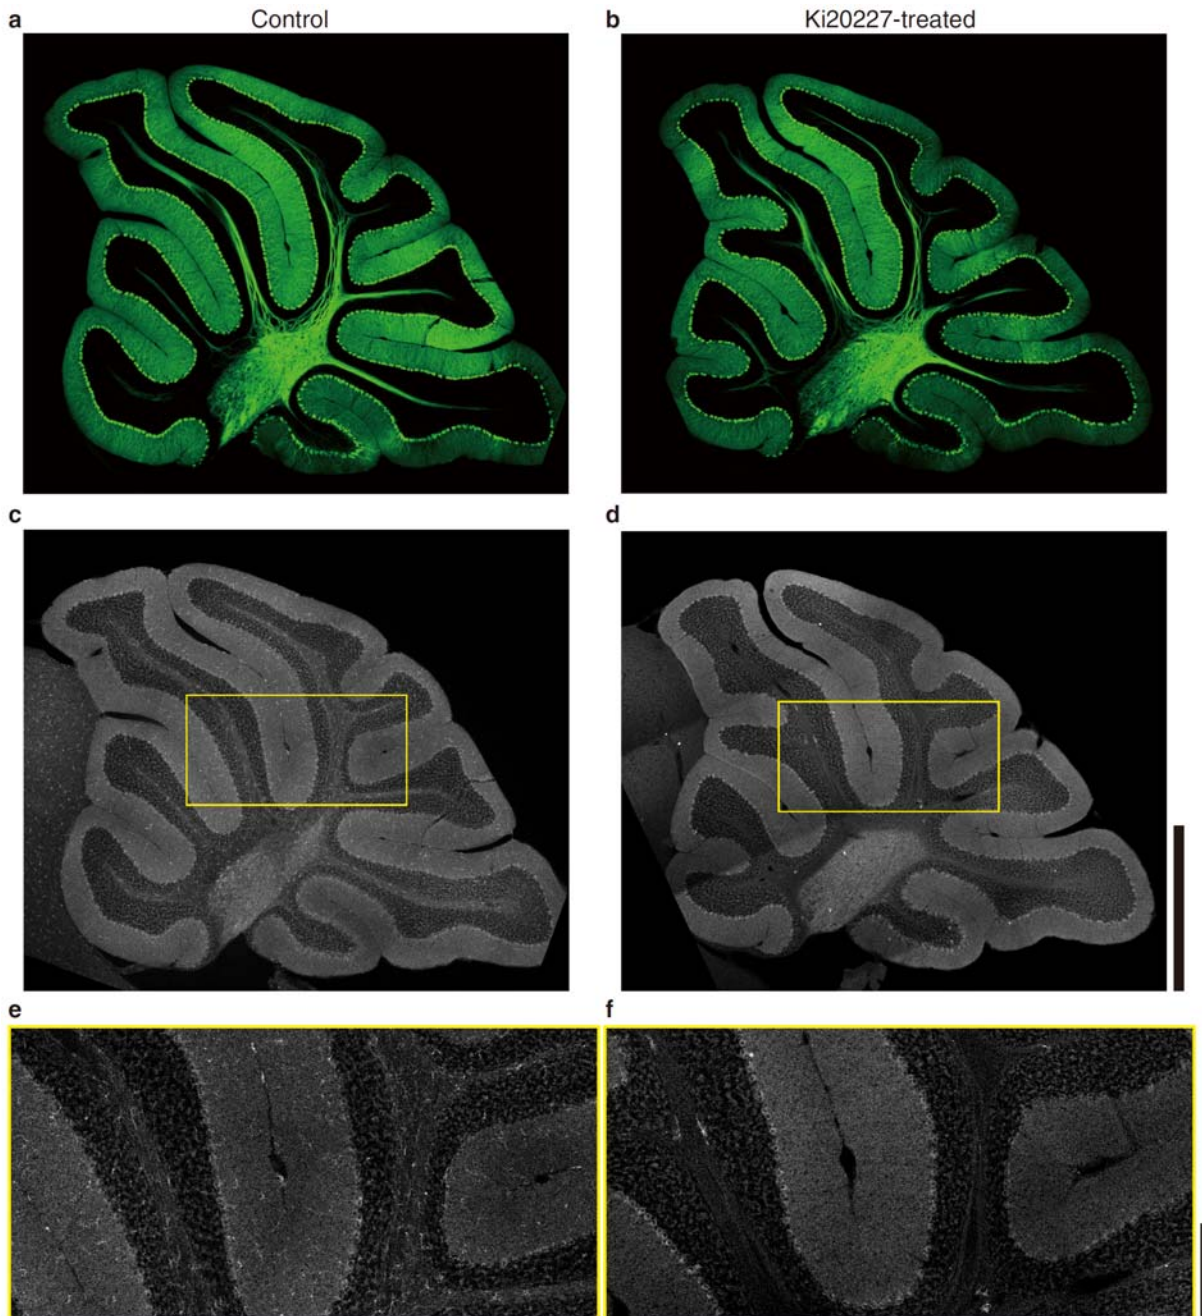

145

146 **Supplementary Figure 2 | Microglia depletion in the cerebellum of Ki20227-treated mice.**

147 Whole cerebellar sagittal images of control (a and c) and Ki20227-administered (b and d) mice by

148 calbindin (green) and Iba1 (white) co-immunostaining. Expansion images of yellow squares are

149 shown in bottom (e and f, respectively). Note that the Iba1 positive microglia are not present in the

150 Ki20227-administered cerebellum. Bar scales are 1 mm (c, d) and 200  $\mu$ m (e, f).

151



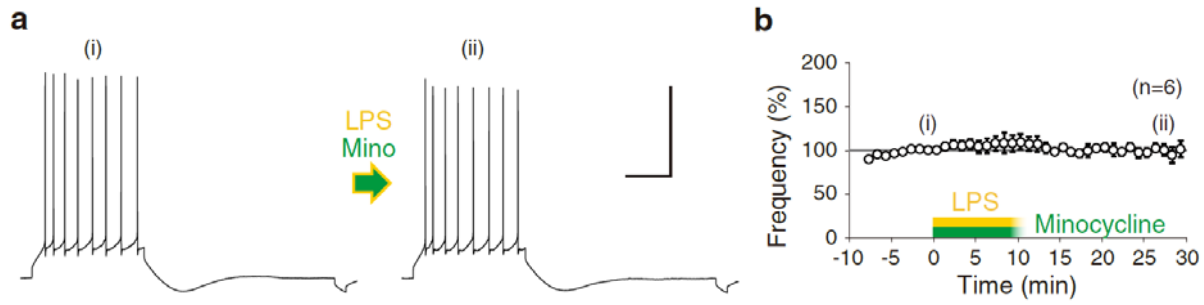

152

153 **Supplementary Figure 3 | Abolishment of LPS-induced intrinsic plasticity under suppression of**

154 **microglia. a**, Action potential firing of Purkinje neurons before and after exposure to LPS (12

155  $\mu\text{g}/\text{mL}$ ) with minocycline-hydrochloride (50 nM). **b**, Time course of the normalized firing frequency

156 (Minocycline+LPS,  $p > 0.7$ , Mann-Whitney  $U$ -test). Drug application began at 0 min. Scale: 40 mV

157 and 200 ms.

158

159

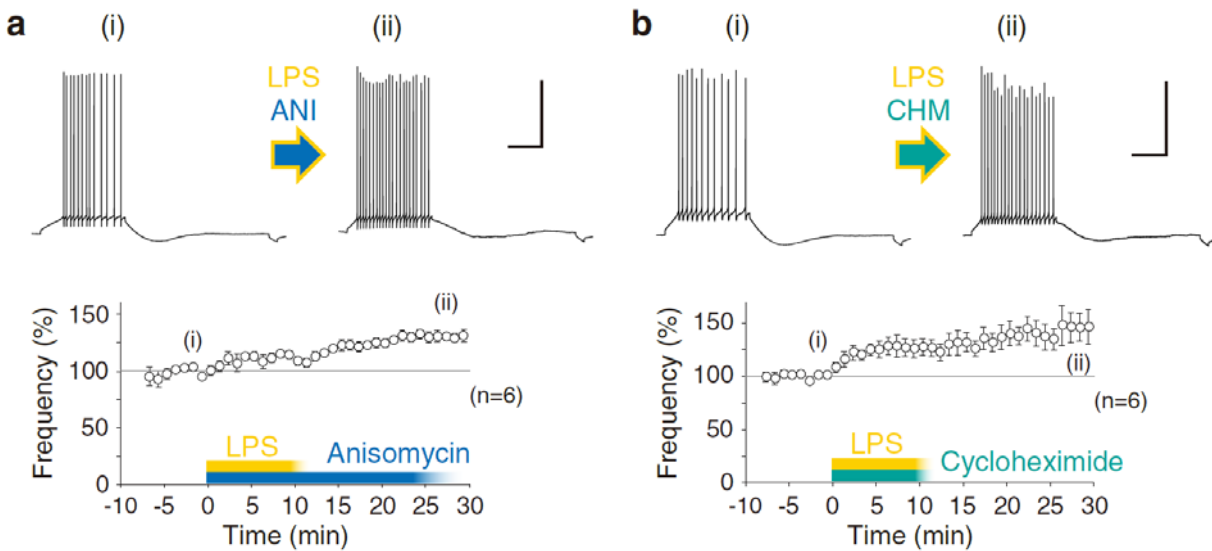

160

161 **Supplementary Figure 4 | Protein-synthesis independence of LPS-induced excitability plasticity.**

162 **a**, Action potential firing of Purkinje neurons following LPS exposure under treatment with

163 anisomycin (30  $\mu$ M) (\* $p$  < 0.03, Mann-Whitney  $U$ -test). **b**, Action potential firing following LPS

164 exposure under treatment with cycloheximide (30  $\mu$ M) (\* $p$  < 0.03). While both data suggested that

165 the firing increase by exposure to LPS was induced under suppression of protein translation, a minor,

166 and not significant, reduction of the extent of increase in firing frequency was notified compared to

167 LPS-conditioned experiments as shown in Fig.1b. Scale: 40 mV and 200 ms. LPS-application began

168 at 0 min and continued for 10 min.

169

170

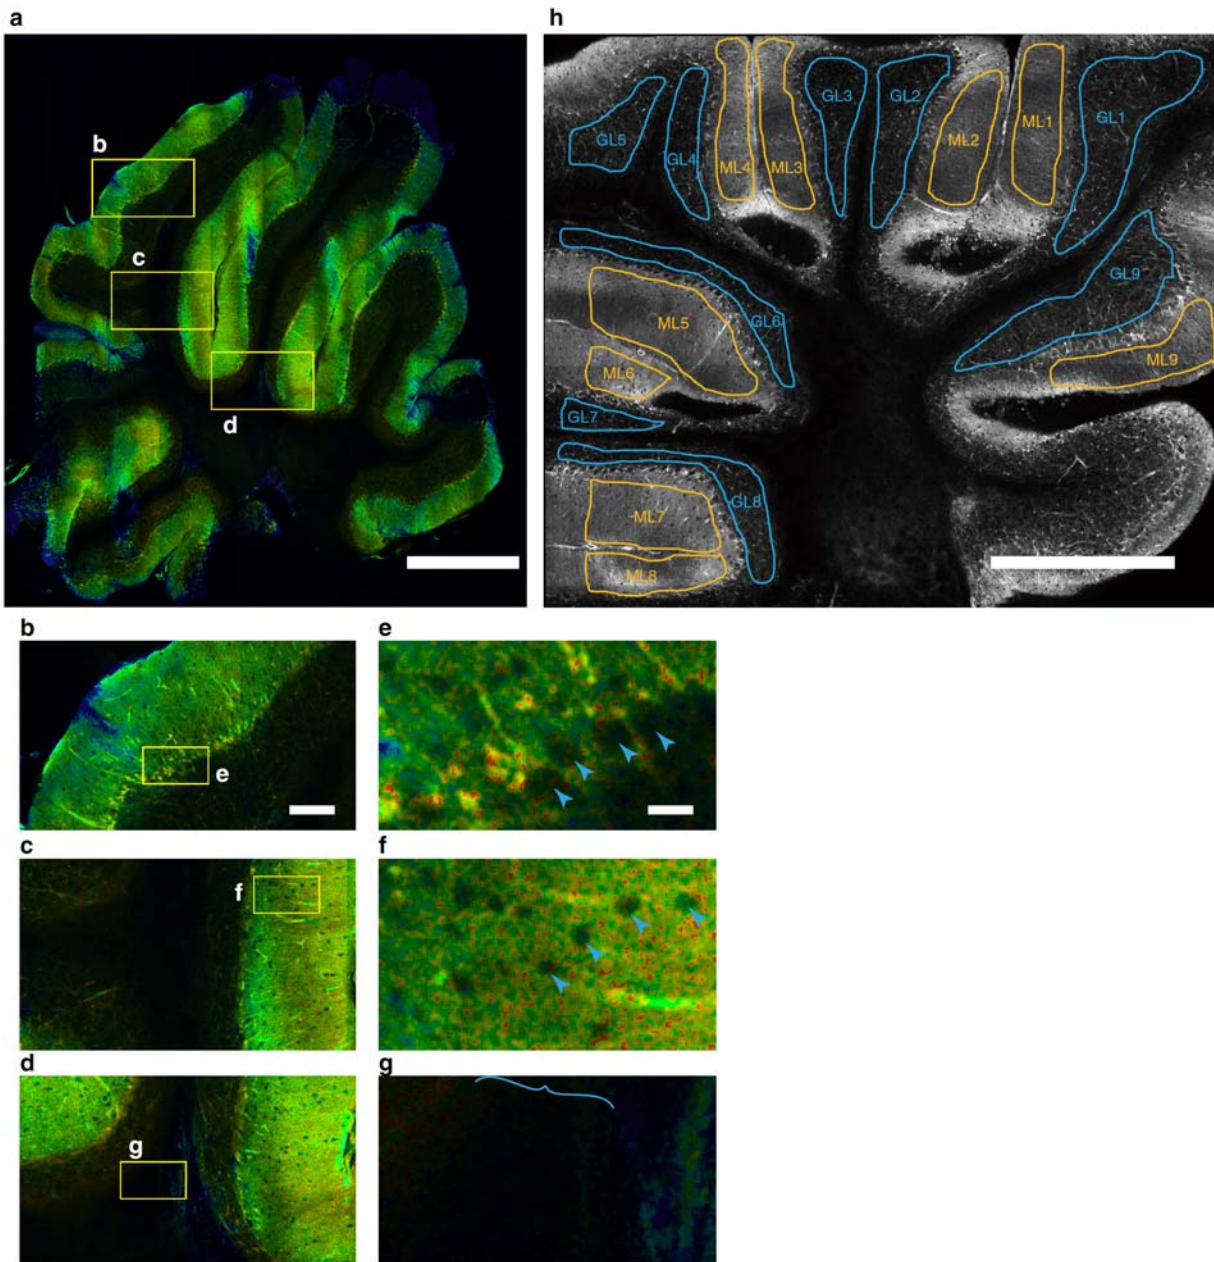

171

172 **Supplementary Figure 5 | FRET image of a whole cerebellar sagittal section. a**, A merged tile-  
173 image of GO-ATeam2 cerebellum is shown as a sagittal section. Please note the vertical stripe of  
174 discontinuity is due to the slice anchor. **b-d**, Expanded images in the yellow flamed regions in (a). **e-**  
175 **g**, Expanded images in the yellow flamed regions in (b-d), respectively. Arrowheads indicate the cell  
176 body of Purkinje neurons (e), or interneurons in the ML (f). The curly bracket indicates the location  
177 of a bundle in the white matter (g). **h**, ROIs of ATP concentration changes were selected as in the

178 image. Numbering of ML-X and GL-X indicates in the molecular layer and in the white matter,

179 respectively. Bar scale: 1 mm (a, h), 200  $\mu\text{m}$  (b), and 40  $\mu\text{m}$  (e). FRET, fluorescence/Förster

180 resonance energy transfer.

181

182

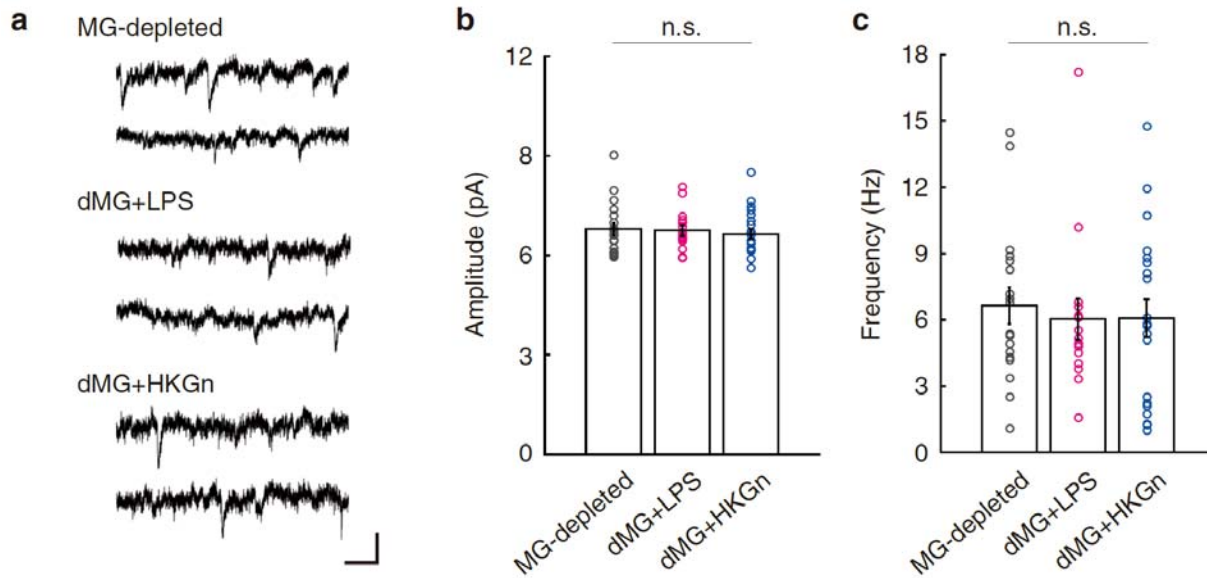

183

184 **Supplementary Figure 6 | Excitatory synaptic transmission in Purkinje cells in microglia-**

185 **depleted cerebella. a**, Representative spontaneous excitatory postsynaptic currents (sEPSCs) traces

186 of microglia (MG)-depleted mice. Scale: 10 pA, 100 ms. Bar graphs of amplitude (b) and frequency

187 (c) of sEPSC in different experiments (mean  $\pm$  SEM) are shown. Total numbers of 18, 15 and 21

188 cells were recorded in the MG-depleted (dMG) control, dMG LPS- and HKGn-exposure,

189 respectively. Amplitude: MG-depleted,  $6.8 \pm 0.2$  pA; dMG+LPS,  $6.8 \pm 0.2$  pA; dMG+HKGn,  $6.6 \pm$

190  $0.2$  pA. Frequency: MG-depleted,  $6.7 \pm 0.8$  Hz; dMG+LPS,  $6.0 \pm 0.9$  Hz; dMG+HKGn,  $6.1 \pm 0.8$  Hz.

191 No significant differences (n.s.) were observed among all pairs ( $p > 0.3$ , in Mann-Whitney *U*-test

192 against MG-depleted control), as well as those in rise time, half-width, and decay time (*data not*

193 *shown*).

194

195

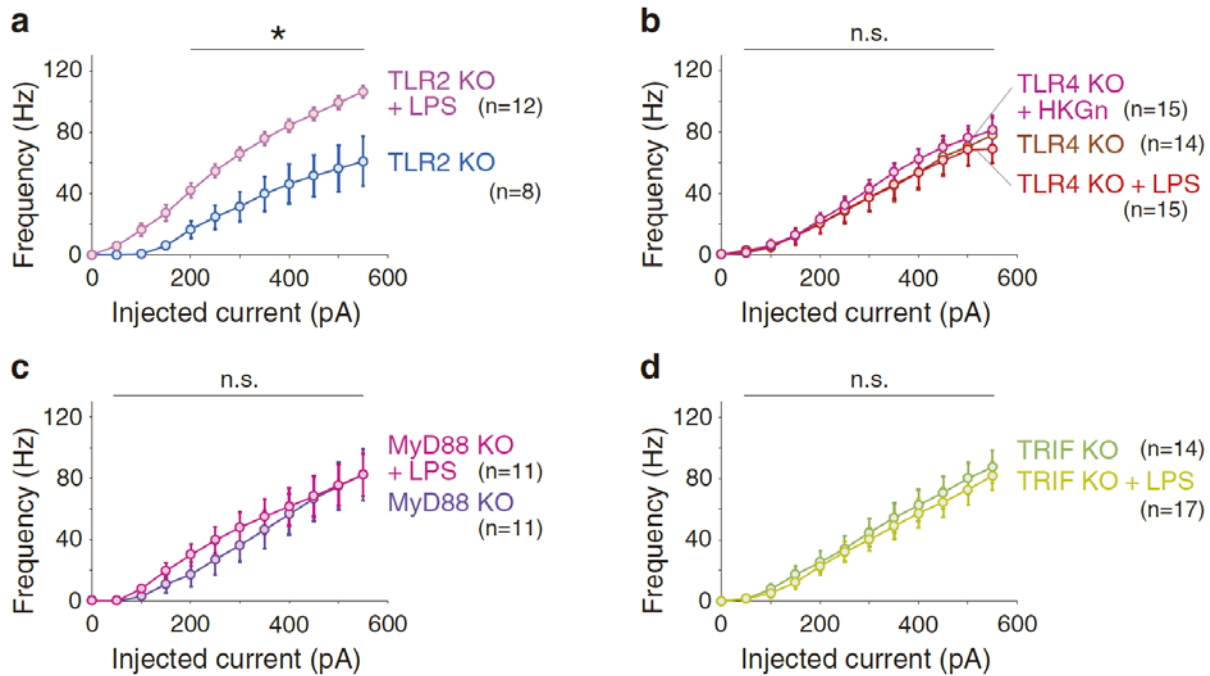

196

197 **Supplementary Figure 7 | Firing frequency of TLRs, MyD88 and TRIF KO Purkinje cells.**

198 Firing frequency of TLR2 KO (a), TLR4 KO (b), MyD88 KO (c) and TRIF KO (d) neurons in  
199 response to different depolarization pulses. No significant difference was observed between LPS- or  
200 HKGn-exposed and non-exposed neurons in either transgenic mouse line, except for in TLR2 KO (a).

201 Asterisk indicates  $p < 0.05$  in the Mann-Whitney  $U$ -test. MyD88 KO, Myeloid differentiation  
202 primary response gene 88 knockout mice; TLR2/4 KO, Toll-like receptor 2/4 knockout mice; TRIF  
203 KO, TIR-domain-containing adapter-inducing interferon- $\beta$  knockout mice.

204

205

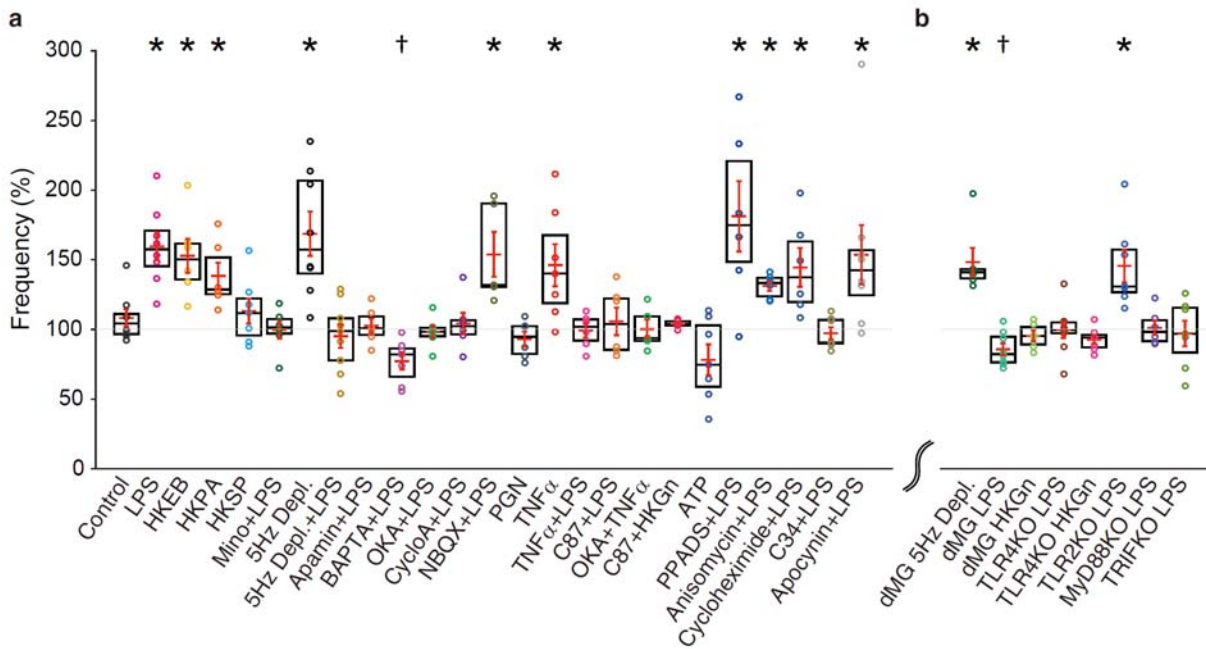

206

207 **Supplementary Figure 8 | Summary of the extent of excitability changes.** Firing frequency

208 changes after the application of various reagents or conditioning for intrinsic plasticity in rat (a) and

209 mouse neurons (b). All data from long-term recordings in this study were summarized as the mean  $\pm$

210 SEM (red mark) with a box plot. Asterisks indicate significant increases ( $p < 0.05$ , in the Mann-

211 Whitney *U*-test). Daggers indicate significant decreases ( $p < 0.05$ ).

212

213

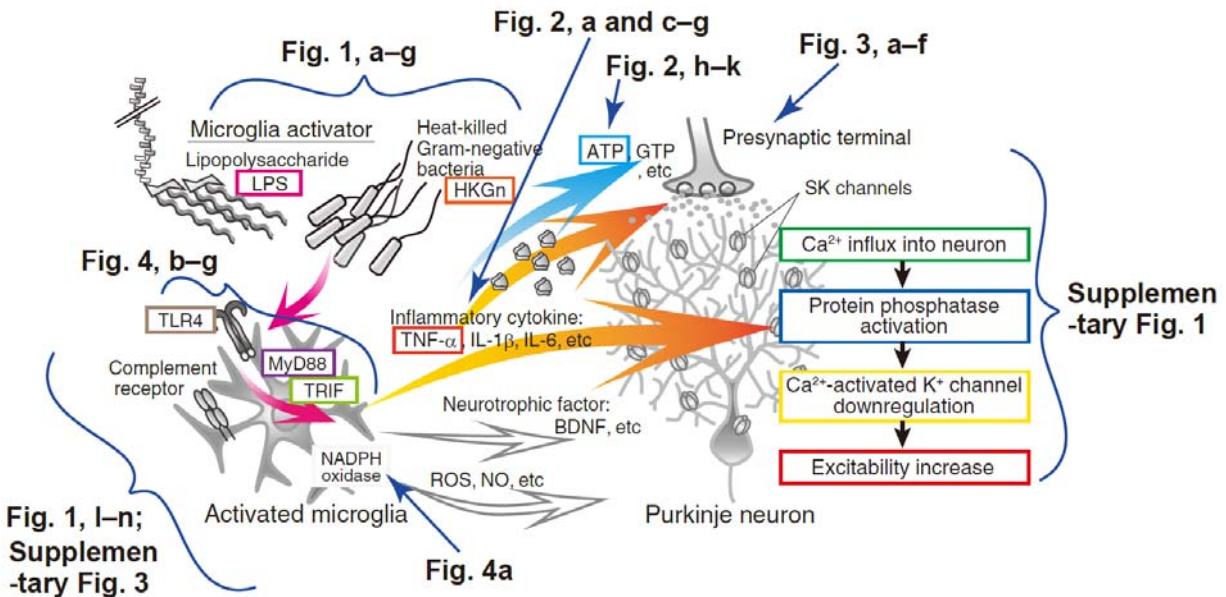

214

215 **Supplementary Figure 9 | Experimental diagram of the endotoxin-induced excitability**

216 **plasticity.** Corresponding figure numbers are tagged or arrowed to the signaling cascade.

217

218



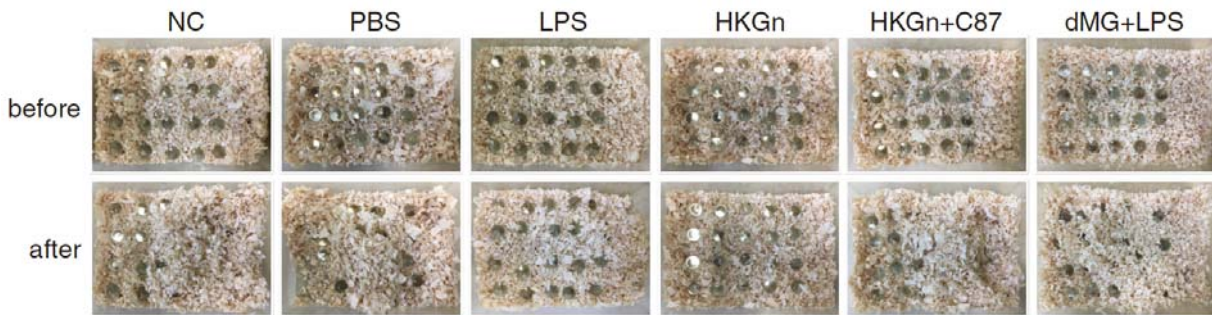

219

220 **Supplementary Figure 10 | Marble burying of rats injected microglia activators and those**

221 **suppressed inflammation.** Pictures of marble burying behavior before and after 20-minutes

222 monitoring of drug-infused rats. PBS, LPS, heat-killed Gram-negative bacteria mixture (HKGn:

223 HKEB+HKPA), HKGn+C87, or nothing (NC) was injected into the cerebellar vermis. In other

224 experiments, LPS was injected into the cerebellum of microglia-depleted rats (dMG+LPS). Note that

225 rats with LPS- and HKGn-injection hid less marbles compared to NC, PBS, HKGn+C87 and

226 dMG+LPS.

227

228

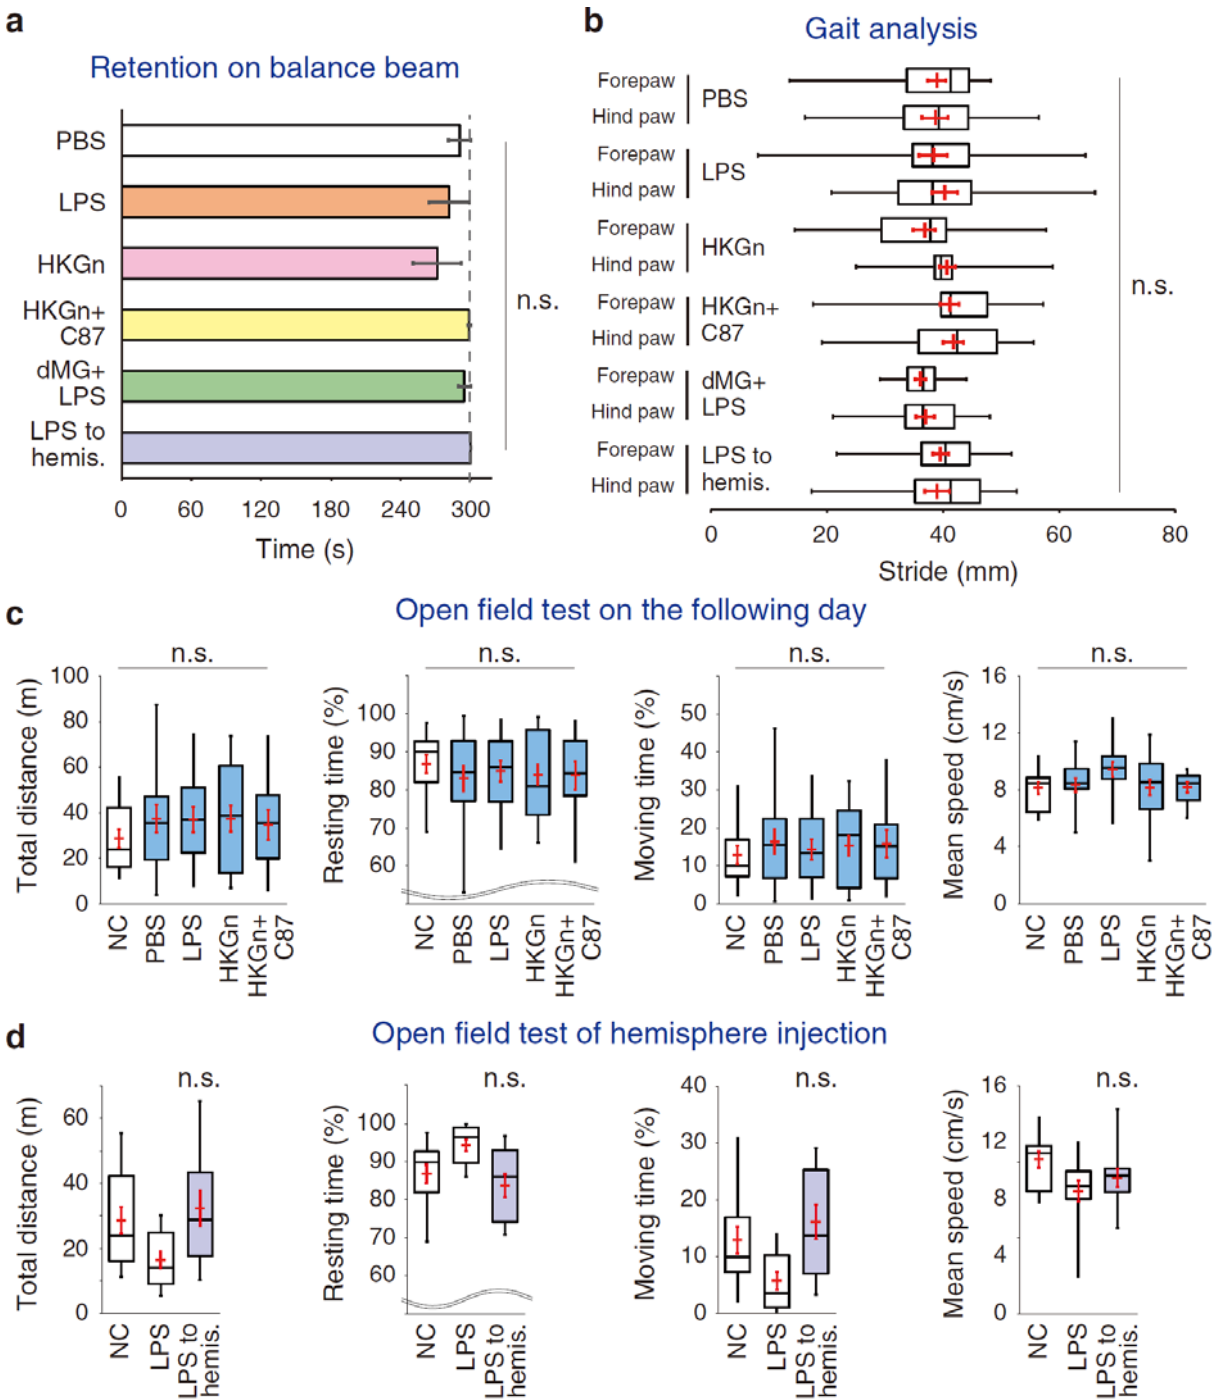

229

230 **Supplementary Figure 11 | Other behavior paradigms of reagent-injected animals. a**, Retention

231 time on balance beam of drug-infused rats in total 5-minute measurement. PBS, LPS, heat-killed

232 Gram-negative bacteria mixture (HKGn), and HKGn+C87 was injected into the cerebellar vermis. In

233 some experiments, LPS was injected into the cerebellum of microglia-depleted rats (dMG+LPS).

234 Alternatively, LPS was injected into the cerebellar hemispheres (LPS to hemis.). **b**, Stride length

235 during walking in reagent-infused rats. **c**, Exploration behavior in the open field arena one day after  
236 drug-infusion. Box plots of the total distance, resting time, moving time, and mean speed of PBS-,  
237 LPS-, HKGn- and HKGn+C87-infused rats on the following day are shown as light-blue colored  
238 boxes. **d**, Open field test of LPS to hemispheres-animals. White boxes in (c) and (d) are NC and LPS  
239 data of Fig. 5b for comparison. No significant differences were found in all parameters.

240

241

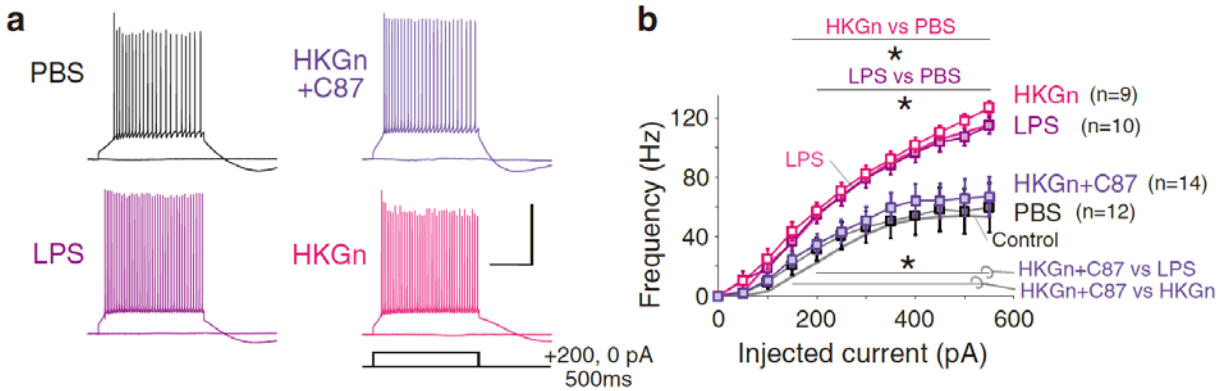

242

243 **Supplementary Figure 12 | Firing frequency of Purkinje cells obtained from drug-treated rats.**

244 Representative traces (a) and the firing frequency (b) of neurons under slice preparation obtained

245 from the cerebellar vermis of rats injected with control saline, LPS, heat-killed Gram-negative

246 bacteria (HKGn), or HKGn+C87 in response to different depolarization pulses. Mean firing

247 frequency of LPS-exposed and control neurons from Fig. 1b are merged for comparison (b). Neurons

248 from LPS- and HKGn-injected cerebella exhibited a significant increase in firing frequency relative

249 to that observed for control saline-injected and HKGn+C87 co-injected neurons (\* $p < 0.05$ ),

250 suggesting that the TNF- $\alpha$  inhibitor suppressed the increase in Purkinje cell excitability *in vivo*.

251 Scale: 40 mV and 200 ms. TNF- $\alpha$ , tumor necrosis factor alpha

252

253

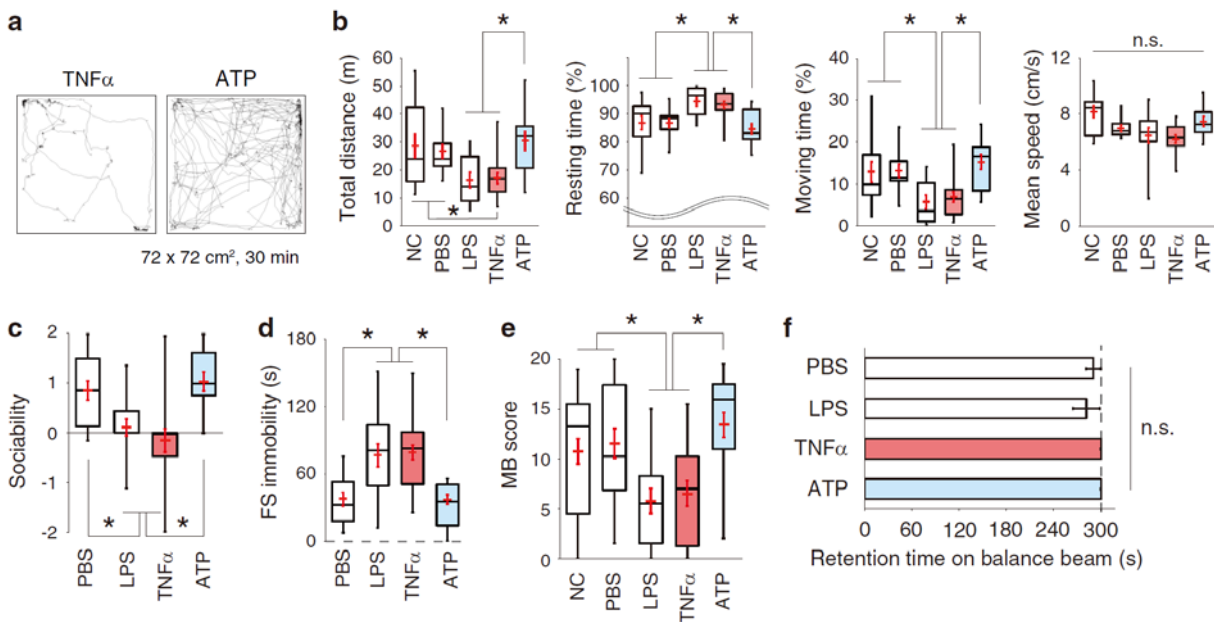

254

255 **Supplementary Figure 13 | Behavior tests in ATP- and TNF- $\alpha$ -infused animals. a,**

256 Representative trajectories of reagent-infused rats in the open field arena. TNF- $\alpha$  (20  $\mu$ g/mL) or ATP

257 (20 mM) was injected into the anterior cerebellar vermis. **b**, Box plots of the total distance, resting

258 time, moving time, and mean speed. Injection of TNF- $\alpha$ , but not ATP, significantly reduced the

259 animals' exploratory behavior, sociability, forced motivation and repetitive behaviors. **c**, Social

260 interaction. **d**, Forced swim test. **e**, Marble burying. **f**, Posture retention test on balance beam. White

261 boxes in (b-f) are NC, PBS and LPS data of Fig. 5b-e and Supplementary Fig. 12b for comparison.

262 Overlapping red marks represent mean  $\pm$  SEM. \* $p$  < 0.05, *multiple comparison*.

263

264

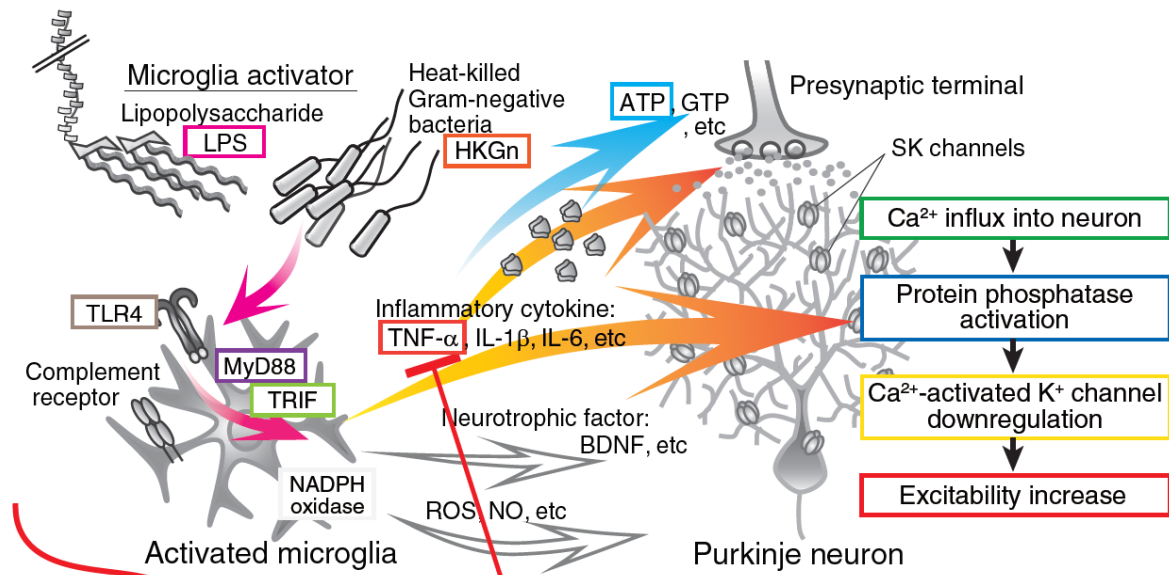

**Microglia depletion,**  
related to Figs. 5, a–e;  
Supplementary Fig. 10;  
Supplementary Figs. 11, a and b

**C87, related to Figs. 5, a–e;**  
Supplementary Fig. 10;  
Supplementary Figs. 11, a–c

265

266 **Supplementary Figure 14 | Potential targets for the rescue of behavior abnormality by**

267 **cerebellar inflammation.** The depletion of microglia and inhibition of TNF- $\alpha$  by C87 used in this  
268 study are shown.

269

270

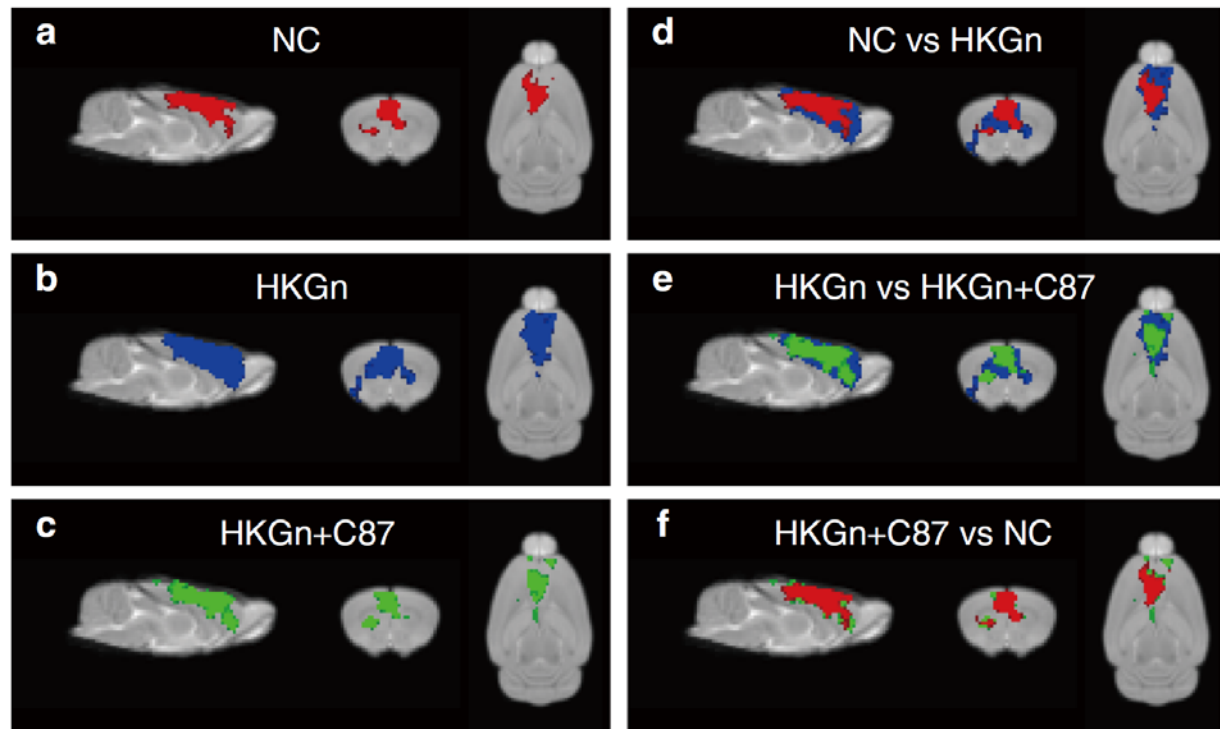

271

272 **Supplementary Figure 15 | Components of frontal cortical area from group ICA of drug-**  
273 **treated rats.** Group-based ICA spatial maps are shown in the same component of NC (red), HKGn  
274 (blue) and HKGn+C87 (green) (a–c, respectively). Merged maps of NC vs HKGn, HKGn vs  
275 HKGn+C87 and HKGn+C87 vs NC are shown in d–f, respectively. Images represent spatial color-  
276 coded 1-p maps of the component, overlaid onto anatomical T2W image. Images were thresholded  
277 by  $p < 0.01$ . Of note, animals HKGn-infused to the cerebellar anterior vermis express larger area of  
278 activation in the medial prefrontal cortex (including infralimbic and prelimbic cortices), cingulate  
279 cortex and primary motor area. And, the enlargement of frontal areas was recovered by C87  
280 administration in the cerebellum. Sagittal, coronal, and transverse planes of brain images are shown  
281 (from left to right). ICA, independent component analysis; NC, non-conditioned; HKGn, heat-killed  
282 Gram-negative bacteria mixture.

283

284

285 **Supplementary information**

286 **Video 1:**

287 Representative movies of open field test of control, inflammation-induced, and rescued animals.

288 Movies fast-forwarded to  $\times 32$  are arranged. From the up-left to up-right: No-conditioned, LPS-

289 injected rats, and a Ki20227-administered rat with LPS injection. From the bottom-left to bottom-

290 right: PBS-injected, HKGn-injected, and HKGn+C87-injected rats. (Related to Fig. 5a,b).

291
